# Supplementary material
Source: PubMed Central journal article supplement (PMC3717254)

## **Ring Expansion of Alkynyl Cyclopropanes to Highly substituted Cyclobutenes via a *N*-Sulfonyl-1,2,3-Triazole Intermediate**

Renhe Liu, Min Zhang, Gabrielle Winston-McPherson, and Weiping Tang\*

School of Pharmacy, University of Wisconsin, Madison, 53705

*wtang@pharmacy.wisc.edu*

### **General remarks**

All reactions in non-aqueous media were conducted under a positive pressure of dry argon in glassware that had been oven dried prior to use unless noted otherwise. Anhydrous solutions of reaction mixtures were transferred via an oven dried syringe or cannula. All solvents were dried prior to use unless noted otherwise. Reagents were purchased from Aldrich, Acros, TCI, or VWR unless otherwise noted. Thin layer chromatography was performed using precoated silica gel plates (EMD Chemical Inc. 60,F254). Flash column chromatography was performed with silica gel (Silicycle, 40-63 $\mu$ m). Infrared spectra (IR) were obtained as neat oils on a Bruker Equinox 55 spectrophotometer.  $^1\text{H}$  and  $^{13}\text{C}$  Nuclear Magnetic Resonance (NMR) spectra were obtained on a Varian Unity-Inova 400 MHz or 500 MHz recorded in ppm ( $\delta$ ) downfield of TMS ( $\delta = 0$ ) in  $\text{CDCl}_3$ ,  $\text{CD}_3\text{OD}$ . Signal splitting patterns were described as singlet (s), doublet (d), triplet (t), quartet (q), quintet (quint), or multiplet (m), with coupling constants ( $J$ ) in hertz. High resolution mass spectra (HRMS) were performed by Analytical Instrument Center at the School of Pharmacy or Department of Chemistry on an Electron Spray Injection (ESI) mass spectrometer. Enantiomeric excess was determined by chiral HPLC analysis. The optical rotation was determined by Perkin-Elmer 241 Polarimeter.

### Characterization data for alkynyl cyclopropane substrates:

Unless noted otherwise, alkynyl cyclopropanes were prepared by cyclopropanation of alkenes followed by alkyne formation as shown below following literature procedures.

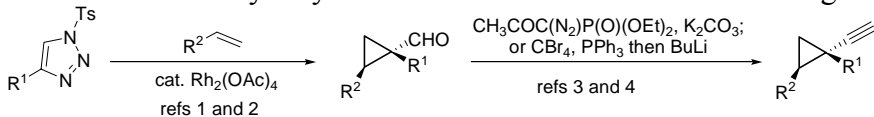

### References:

- 1) S. Chuprakov, S. W. Kwok, L. Zhang, L. Lercher and V. V. Fokin, *J. Am. Chem. Soc.*, 2009, **131**, 18034.
- 2) N. Grimster, L. Zhang and V. V. Fokin, *J. Am. Chem. Soc.*, 2010, **132**, 2510.
- 3) S. Muller, B. Liepold, G. J. Roth and H. J. Bestmann, *Synlett*, 1996, 521.
- 4) E. J. Corey and P. L. Fuchs, *Tetrahedron Lett.*, 1972, **13**, 3769.

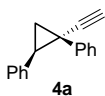

$^1H$  NMR (400 MHz,  $CDCl_3$ ):  $\delta$  1.89 (dd,  $J = 8.97, 5.65$  Hz, 1H), 1.97 (dd,  $J = 7.21, 5.46$  Hz, 1H), 2.13 (s, 1H), 2.95 (dd,  $J = 9.1, 7.21$  Hz, 1H), 6.91 (m, 2H), 7.05-7.21 (m, 8H);  $^{13}C$  NMR ( $CDCl_3$ , 100 MHz):  $\delta$  19.94, 24.21, 34.44, 64.77, 89.77, 126.24, 126.63, 127.71, 127.92, 128.42, 129.26, 136.12, 136.63. IR ( $CHCl_3$ )  $\nu$  3289, 3028, 2113, 1712, 1498, 762,  $695cm^{-1}$ . HRMS (ESI)  $m/z$  calcd for  $C_{17}H_{14}$  ( $M+Na$ ) $^+$  241.0988, found 241.0989.

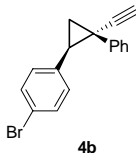

$^1H$  NMR (400 MHz,  $CDCl_3$ ):  $\delta$  1.89 (m, 2H), 2.11 (s, 1H), 2.85 (d,  $J = 8.1$  Hz, 1H), 6.74 (d,  $J = 8.2$  Hz, 2H), 7.09-7.17 (m, 5H), 7.36 (d,  $J = 8.5$  Hz, 2H);  $^{13}C$  NMR ( $CDCl_3$ , 100 MHz):  $\delta$  20.04, 24.42, 33.79, 65.03, 89.37, 120.15, 126.92, 128.14, 129.24, 130.01, 130.82, 135.37, 136.24. IR ( $CHCl_3$ )  $\nu$  3294, 3027, 2925, 2114, 1712, 1489, 1009,  $697cm^{-1}$ . HRMS (ESI)  $m/z$  calcd for  $C_{17}H_{13}Br$  ( $M+Na$ ) $^+$  319.0093, found 319.0094.

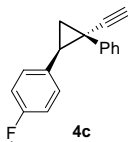

$^1H$  NMR (400 MHz,  $CDCl_3$ ):  $\delta$  1.89 (m, 2H), 2.11 (s, 1H), 2.89 (d,  $J = 8.2$  Hz, 1H), 6.78 (t,  $J = 8.77$  Hz, 2H), 6.85 (m, 2H), 7.08-7.17 (m, 5H);  $^{13}C$  NMR ( $CDCl_3$ , 100 MHz):  $\delta$  19.99, 24.05, 33.72, 64.91, 89.52, 114.63 (d,  $^2J = 21.5$  Hz), 126.74, 128.00, 129.13, 129.88 (d,  $^3J = 8.5$  Hz), 131.86 (d,  $^4J = 3.1$  Hz), 136.42, 161.42 (d,  $^1J = 244.9$  Hz). IR ( $CHCl_3$ )  $\nu$  3295, 3058, 2114, 1510, 1218, 836,  $697cm^{-1}$ . HRMS (ESI)  $m/z$  calcd for  $C_{17}H_{13}F$  ( $M+Na$ ) $^+$  259.0894, found 259.0892.

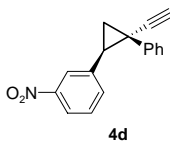

$^1H$  NMR (400 MHz,  $CDCl_3$ ):  $\delta$  1.95 (dd,  $J = 8.85, 5.97$  Hz, 1H), 2.04 (t,  $J = 6$  Hz, 1H), 2.12 (s, 1H), 2.96 (t,  $J = 7.4$  Hz, 1H), 7.05-7.25 (m, 7H), 7.73 (s, 1H), 7.85 (d,  $J = 7.8$  Hz, 1H);  $^{13}C$  NMR ( $CDCl_3$ , 100 MHz):  $\delta$  19.83, 25.04, 33.57, 65.48, 88.67, 121.29, 123.02, 127.18,

128.26, 128.52, 129.19, 134.36, 135.57, 138.63, 147.72. IR (CHCl<sub>3</sub>)  $\nu$  3294, 3027, 2356, 2116, 1527, 1347, 693cm<sup>-1</sup>. HRMS (ESI) m/z calcd for C<sub>17</sub>H<sub>13</sub>NO<sub>2</sub> (M+Na)<sup>+</sup> 286.0839, found 286.0837.

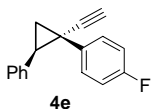

<sup>1</sup>H NMR (500 MHz, CDCl<sub>3</sub>):  $\delta$  1.94-2.00 (m, 2H), 2.20 (s, 1H), 3.02 (dd,  $J=9.0, 7.5$ Hz, 1H), 6.89-6.92 (m, 2H), 6.98 (d,  $J=12.0$ Hz, 2H), 7.16-7.23 (m, 5H); <sup>13</sup>C NMR (CDCl<sub>3</sub>, 125 MHz): 20.21, 23.76, 34.50, 65.23, 89.67, 115.02 (<sup>2</sup> $J=21.4$  Hz), 126.60, 128.04, 128.55, 131.09 (<sup>3</sup> $J=8.1$ Hz), 132.76 (<sup>4</sup> $J=3.1$ Hz), 136.07, 161.71 (<sup>1</sup> $J=244$  Hz); IR (CHCl<sub>3</sub>)  $\nu$  3300, 2114, 1509, 1221, 907, 731 cm<sup>-1</sup>. HRMS (ESI) m/z calcd for C<sub>17</sub>H<sub>13</sub>F (M+Na)<sup>+</sup> 259.0894, found 259.0898.

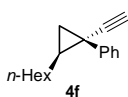

<sup>1</sup>H NMR (400 MHz, CDCl<sub>3</sub>):  $\delta$  0.70 (m, 1H), 0.82 (t,  $J=7.4$ Hz, 3H), 1.10-1.33 (m, 10H), 1.38 (dd,  $J=8.8, 4.9$ Hz, 1H), 1.53 (m, 1H), 1.96 (s, 1H), 7.23 (m, 1H), 7.30 (m, 2H), 7.37 (m, 2H); <sup>13</sup>C NMR (CDCl<sub>3</sub>, 100 MHz):  $\delta$  14.01, 19.90, 20.69, 22.49, 28.72, 28.92, 29.14, 29.99, 31.63, 63.69, 90.67, 126.67, 128.13, 129.10, 137.95. IR (CHCl<sub>3</sub>)  $\nu$  3310, 2927, 2856, 2114, 1448, 909, 733, 698cm<sup>-1</sup>. HRMS (ESI) m/z calcd for C<sub>17</sub>H<sub>22</sub> (M+H)<sup>+</sup> 227.1794, found 227.1792.

Alkynyl cyclopropane **4h** was prepared in three steps following literature procedures.

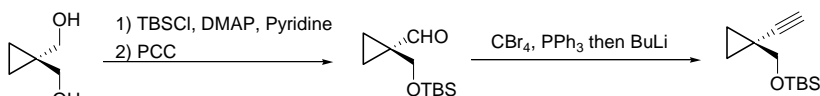

- 1) S. Zhou, M. N. Prichard, J. Zemlicka, *Tetrahedron*, 2007, **63**, 9406.
- 2) E. J. Corey and P. L. Fuchs, *Tetrahedron Lett.*, 1972, **13**, 3769.

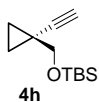

<sup>1</sup>H NMR (400 MHz, CDCl<sub>3</sub>):  $\delta$  0.07 (s, 6H), 0.81 (m, 2H), 0.85 (m, 2H), 0.90 (s, 9H), 1.88 (s, 1H), 3.64 (s, 2H); <sup>13</sup>C NMR (CDCl<sub>3</sub>, 100 MHz):  $\delta$  -5.31, 11.91, 13.58, 18.38, 25.88, 65.09, 66.10, 87.92. IR (CHCl<sub>3</sub>)  $\nu$  3316, 2930, 2896, 2115, 1102, 835 cm<sup>-1</sup>. HRMS (ESI) m/z calcd for C<sub>12</sub>H<sub>22</sub>OSi (M+Na)<sup>+</sup> 233.1332, found 233.1325.

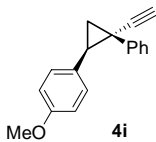

<sup>1</sup>H NMR (400 MHz, CDCl<sub>3</sub>):  $\delta$  1.83 (m, 2H), 2.08 (s, 1H), 2.85 (t,  $J=8$ Hz, 1H), 3.68 (s, 3H), 6.61 (d,  $J=8.7$ Hz, 2H), 6.80 (d,  $J=8.6$ Hz, 2H), 7.04-7.16 (m, 5H); <sup>13</sup>C NMR (CDCl<sub>3</sub>, 100 MHz):  $\delta$  20.08, 23.83, 33.96, 55.07, 64.65, 89.94, 113.22, 126.54, 127.92, 128.15, 129.16, 129.49, 136.81, 158.03. IR (CHCl<sub>3</sub>)  $\nu$  3286, 3006, 2935, 2112, 1712, 1513, 697cm<sup>-1</sup>. HRMS (ESI) m/z calcd for C<sub>17</sub>H<sub>16</sub>O (M+Na)<sup>+</sup> 271.1093, found 271.1094.

Alkynyl cyclopropane **4j** was prepared in four steps following literature procedures.

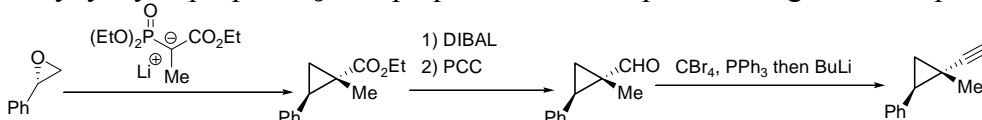

1) C. D. Bray, F. Minicone, *Chem. Commun.*, 2010, **46**, 5867.

2) E. J. Corey and P. L. Fuchs, *Tetrahedron Lett.*, 1972, **13**, 3769.

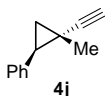

<sup>1</sup>H NMR (400 MHz, CDCl<sub>3</sub>): δ 0.97 (s, 3H), 1.09 (dd, *J*=6.82, 5.07Hz, 1H), 1.39 (dd, *J*=8.77, 4.87Hz, 1H), 1.94 (s, 1H), 2.53 (t, *J*=8.5 Hz, 1H), 7.18-7.31 (m, 5H); <sup>13</sup>C NMR (CDCl<sub>3</sub>, 100 MHz): δ 13.00, 18.82, 19.91, 31.23, 63.51, 91.17, 126.51, 128.13, 129.15, 136.98. IR (CHCl<sub>3</sub>) ν 2923, 2854, 2341, 1460, 1166, 736cm<sup>-1</sup>. HRMS (ESI) *m/z* calcd for C<sub>12</sub>H<sub>12</sub>(M+H)<sup>+</sup> 157.1017, found 157.1011.

### General procedure for the ring expansion of alkynyl cyclopropanes to cyclobutene aldehydes:

To a 4 mL vial equipped with a stirring bar, azide **13c** (0.2 mmol), and alkyne (0.2 mmol) was added CuTc (0.02 mmol), AgOTf (0.02 mmol) and toluene (2 mL). The reaction mixture was stirred in the capped vial at room temperature for 4-8 h until starting material was completely consumed as determined by TLC analysis. Several drops of water and 20 mg alumina oxide were added to the reaction mixture. The resulting suspension was stirred for 1 h until hydrolysis of imine was completed. Solvents were removed under vacuum. The residue was purified by flash column chromatography with ethyl acetate/hexane (1/10 to 1/4) as eluent to give the corresponding cyclobutene aldehyde.

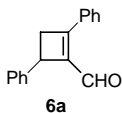

<sup>1</sup>H NMR (400 MHz, CDCl<sub>3</sub>): δ 2.77 (dd, *J*=15.6, 2.8Hz, 1H), 3.38 (dd, *J*=15.6, 5.1Hz, 1H), 4.27 (d, *J*=5.1Hz, 1H), 7.24 (m, 3H), 7.31 (m, 2H), 7.46 (m, 5H), 10.04 (s, 1H); <sup>13</sup>C NMR (CDCl<sub>3</sub>, 100 MHz): δ 37.79, 41.84, 109.76, 126.73, 126.80, 128.44, 128.51, 128.58, 128.87, 131.09, 185.83. IR (CHCl<sub>3</sub>) ν 3029, 2918, 1658, 907, 728cm<sup>-1</sup>. HRMS (ESI) *m/z* calcd for C<sub>17</sub>H<sub>14</sub>O (M+Na)<sup>+</sup> 257.0937, found 257.0935.

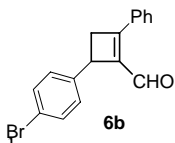

<sup>1</sup>H NMR (400 MHz, CDCl<sub>3</sub>): δ 2.74 (dd, *J*=15.6, 2.0Hz, 1H), 3.38 (dd, *J*=15.6, 5.1Hz, 1H), 4.22 (d, *J*=5.0Hz, 1H), 7.18 (d, *J*=8.6Hz, 2H), 7.41-7.52(m, 5H), 7.75 (m, 2H), 10.05 (s, 1H); <sup>13</sup>C NMR (CDCl<sub>3</sub>, 100 MHz): δ 37.84, 41.46, 120.72, 128.75, 128.81, 129.19, 131.50, 131.88, 133.07, 139.29, 140.79, 159.45, 185.23. IR (CHCl<sub>3</sub>) ν 2921,

1656, 1402, 907, 728 $\text{cm}^{-1}$ . HRMS (ESI)  $m/z$  calcd for  $\text{C}_{17}\text{H}_{13}\text{BrO}$  ( $\text{M}+\text{Na}$ ) $^{+}$  335.0042, found 335.0038.

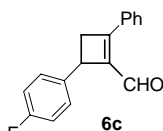

$^1\text{H}$  NMR (400 MHz,  $\text{CDCl}_3$ ):  $\delta$  2.72 (dd,  $J=15.6, 2.1\text{Hz}$ , 1H), 3.37 (dd,  $J=15.6, 5.2\text{Hz}$ , 1H), 4.21 (dd,  $J=5.1, 2.0\text{Hz}$ , 1H), 6.99 (m, 2H), 7.25 (m, 2H), 7.47 (m, 3H), 7.74 (m, 2H), 10.04 (s, 1H);  $^{13}\text{C}$  NMR ( $\text{CDCl}_3$ , 100 MHz):  $\delta$  37.87, 41.07, 115.35 (d,  $^2J=20.7\text{Hz}$ ), 128.26 (d,  $^3J=8.5\text{Hz}$ ), 128.51, 128.93, 131.21, 132.9, 136.95 (d,  $^4J=3.1\text{Hz}$ ), 139.34, 159.01, 161.71 (d,  $^1J=224.9\text{Hz}$ ) 185.69. IR ( $\text{CHCl}_3$ )  $\nu$  2918, 2849, 1709, 1508, 1220, 692 $\text{cm}^{-1}$ . HRMS (ESI)  $m/z$  calcd for  $\text{C}_{17}\text{H}_{13}\text{FO}$  ( $\text{M}+\text{Na}$ ) $^{+}$  275.0843, found 275.0839.

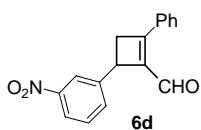

$^1\text{H}$  NMR (400 MHz,  $\text{CDCl}_3$ ):  $\delta$  2.81 (dd,  $J=15.6, 1.6\text{Hz}$ , 1H), 3.46 (dd,  $J=15.6, 5.6\text{Hz}$ , 1H), 4.36 (dd,  $J=5.1, 1.8\text{Hz}$ , 1H), 7.44-7.55 (m, 4H), 7.65 (d,  $J=8.0\text{Hz}$ , 1H), 7.74 (m, 2H), 8.10 (d,  $J=8.0\text{Hz}$ , 1H), 8.14 (m, 1H), 10.14 (s, 1H);  $^{13}\text{C}$  NMR ( $\text{CDCl}_3$ , 100 MHz):  $\delta$  37.40, 41.15, 121.69, 121.85, 128.57, 129.04, 129.46, 131.53, 132.53, 133.29, 138.47, 143.43, 148.51, 159.18, 185.10. IR ( $\text{CHCl}_3$ )  $\nu$  3017, 2116, 1627, 1327, 693 $\text{cm}^{-1}$ . HRMS (ESI)  $m/z$  calcd for  $\text{C}_{17}\text{H}_{13}\text{NO}_3$  ( $\text{M}+\text{Na}$ ) $^{+}$  302.0788, found 302.0783.

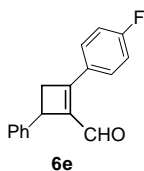

$^1\text{H}$  NMR (500 MHz,  $\text{CDCl}_3$ ): 2.73 (dd,  $J=15.0, 1.5\text{Hz}$ , 1H), 3.34 (dd,  $J=16.0, 5.5\text{Hz}$ , 1H), 4.26 (dd,  $J=5.0, 1.5\text{Hz}$ , 1H), 7.12-7.16 (m, 2H), 7.22-7.25 (m, 1H), 7.28-7.33 (m, 4H), 7.82-7.85 (m, 2H), 9.86 (s, 1H);  $^{13}\text{C}$  NMR ( $\text{CDCl}_3$ , 125 MHz):  $\delta$  38.06, 42.07, 116.23 ( $^2J=21.8\text{Hz}$ ), 127.00, 127.05, 128.85, 129.67 ( $^4J=3.1\text{Hz}$ ), 131.00 ( $^3J=8.6\text{Hz}$ ), 138.68, 141.43, 157.47, 164.54 ( $^1J=251.9\text{Hz}$ ), 186.2; IR ( $\text{CHCl}_3$ )  $\nu$  1598, 1231, 1158, 906  $\text{cm}^{-1}$ . HRMS (ESI)  $m/z$  calcd for  $\text{C}_{17}\text{H}_{13}\text{FO}$  ( $\text{M}+\text{Na}$ ) $^{+}$  275.0843, found 275.0834.

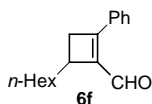

$^1\text{H}$  NMR (400 MHz,  $\text{CDCl}_3$ ):  $\delta$  0.86 (t,  $J=6.6\text{Hz}$ , 3H), 1.18-1.56 (m, 10H), 2.43 (d,  $J=15.4\text{Hz}$ , 1H), 2.99 (dd,  $J=15.4, 4.7\text{Hz}$ , 1H), 3.06 (m, 1H), 7.42 (m, 3H), 7.64 (m, 2H), 10.05 (s, 1H);  $^{13}\text{C}$  NMR ( $\text{CDCl}_3$ , 100 MHz):  $\delta$  14.08, 22.64, 27.46, 29.42, 31.83, 33.21, 34.21, 38.11, 128.21, 128.78, 130.58, 133.57, 141.83, 157.85, 186.06. IR ( $\text{CHCl}_3$ )  $\nu$  2926, 2136, 1656, 1279, 758 $\text{cm}^{-1}$ . HRMS (ESI)  $m/z$  calcd for  $\text{C}_{17}\text{H}_{22}\text{O}$  ( $\text{M}+\text{Na}$ ) $^{+}$  265.1563, found 265.1559.

### General procedure for the ring expansion of alkynyl cyclopropanes to cyclobutene sulfonamides:

To a 4 mL vial equipped with a stirring bar, azide **13c** (0.2 mmol), and alkyne (0.2 mmol) was added CuTc (0.02 mmol), AgOTf (0.02 mmol) and toluene (2 mL). The reaction mixture was stirred in the capped vial at room temperature for 1-8 h until starting material was completely consumed as determined by TLC analysis. The reaction mixture was cooled to -78°C and a solution of LiAlH<sub>4</sub> in THF (2 mL, 0.2M, 0.4 mmol) was added slowly. The mixture was stirred at the same temperature for 1 h and warmed up to 0 °C. The reaction was quenched by careful addition of methanol followed by water. The solid was removed by filtration through a thin silica gel pad. The resulting solution was concentrated under reduced pressure to afford an oily residue which was purified by column chromatography to give the corresponding cyclobutene sulfonamide.

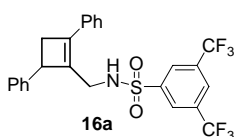

$[\alpha]_D^{20} = -23$  (c=0.5, MeOH). <sup>1</sup>H NMR (400 MHz, CDCl<sub>3</sub>): δ 2.50 (d, *J*=13.1Hz, 1H), 2.98 (dd, *J*=13.1, 4.9Hz, 1H), 3.57 (d, *J*=4.3Hz, 1H), 3.82 (dd, *J*=17.2, 5.3Hz, 1H), 4.20 (dd, *J*=15.2, 5.5Hz, 1H), 4.67 (t, *J*=5.5Hz, 1H), 7.08 (m, 2H), 7.17-7.39 (m, 8H), 8.00 (s, 1H), 8.18 (s, 2H); <sup>13</sup>C NMR (CDCl<sub>3</sub>, 100 MHz): δ 36.75, 40.62, 43.99, 122.36 (d, <sup>1</sup>*J*=272.6Hz), 126.17, 126.28, 126.55, 127.06, 127.29, 128.48, 128.69, 128.88, 132.77 (d, <sup>2</sup>*J*=34.6Hz), 133.52, 136.01, 140.97, 142.88, 143.39. IR (CHCl<sub>3</sub>) ν 3378, 2256, 1279, 908, 733cm<sup>-1</sup>. HRMS (ESI) *m/z* calcd for C<sub>25</sub>H<sub>19</sub>F<sub>6</sub>NO<sub>2</sub>S (M+Na)<sup>+</sup> 534.0933, found 534.0928.

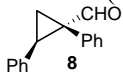

Racemic and chiral cyclopropanes **8** are known compounds and were prepared according to the following reference.

S. Chuprakov, S. W. Kwok, L. Zhang, L. Lercher and V. V. Fokin, *J. Am. Chem. Soc.*, 2009, **131**, 18034.

### Racemic **8**:

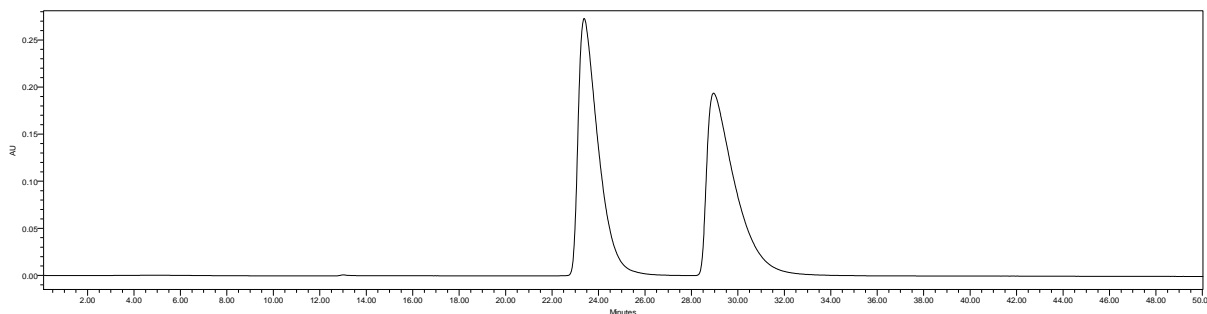

|   | Retention Time | Area     | % Area | Height |
|---|----------------|----------|--------|--------|
| 1 | 23.382         | 16286193 | 49.97  | 272843 |
| 2 | 28.957         | 16304775 | 50.03  | 193596 |

Chiral **8** [ $\alpha$ ]<sub>D</sub><sup>20</sup> = +130, (c=1, MeOH):

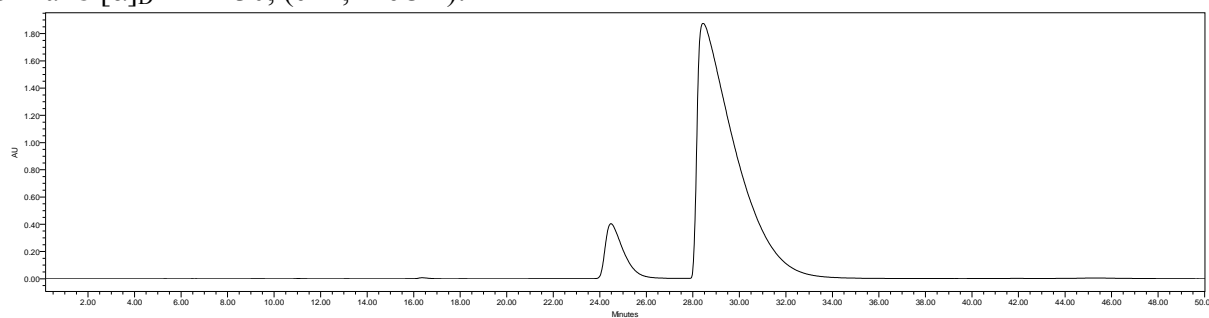

|   | Retention Time | Area      | % Area | Height  |
|---|----------------|-----------|--------|---------|
| 1 | 24.479         | 21520024  | 9.49   | 402980  |
| 2 | 28.442         | 205127815 | 90.51  | 1863761 |

Racemic **16a**:

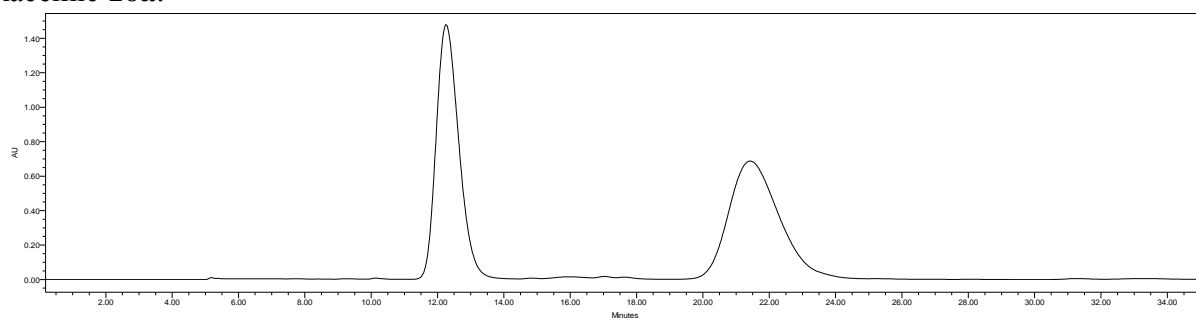

|   | Retention Time | Area     | % Area | Height  |
|---|----------------|----------|--------|---------|
| 1 | 12.257         | 69966637 | 49.77  | 1476051 |
| 2 | 21.423         | 70602059 | 50.23  | 680665  |

Chiral **16a**:

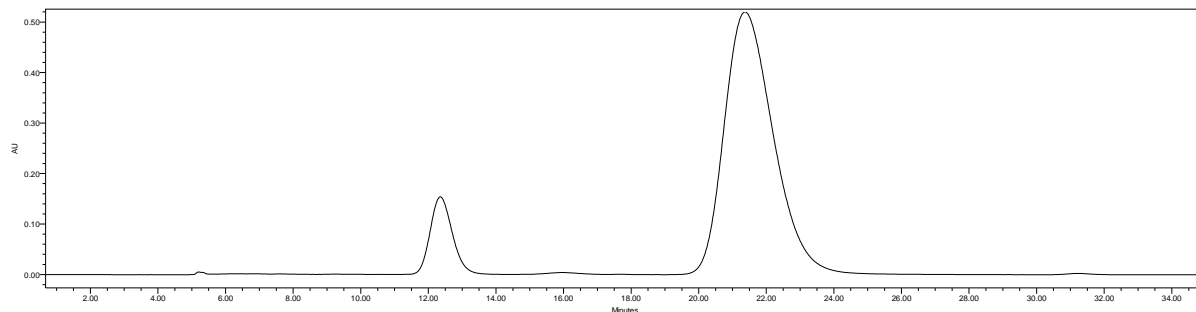

|   | Retention Time | Area     | % Area | Height |
|---|----------------|----------|--------|--------|
| 1 | 12.354         | 5939471  | 10.21  | 143624 |
| 2 | 21.370         | 52255960 | 89.79  | 519707 |

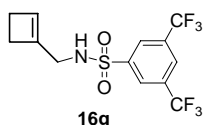

$^1\text{H NMR}$  (400 MHz,  $\text{CDCl}_3$ ):  $\delta$  2.28 (m, 4H), 3.69 (m, 2H), 4.80 (t,  $J=5.5\text{Hz}$ , 1H), 5.79 (m, 1H), 8.08 (s, 1H), 8.33 (s, 2H);  $^{13}\text{C NMR}$  ( $\text{CDCl}_3$ , 100 MHz):  $\delta$  26.77, 29.74, 43.30, 122.44 (d,  $^1J=273.3\text{Hz}$ ), 126.14, 127.42, 131.67, 132.92 (d,  $^2J=34.6\text{Hz}$ ), 142.72, 143.27. IR ( $\text{CHCl}_3$ )  $\nu$  3303, 2929, 2258, 1278, 1142, 905,  $730\text{cm}^{-1}$ . HRMS (ESI)  $m/z$  calcd for  $\text{C}_{13}\text{H}_{11}\text{F}_6\text{NO}_2\text{S}$  ( $\text{M}+\text{Na}$ ) $^+$  382.0307, found 382.0308.

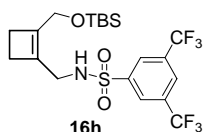

$^1\text{H NMR}$  (400 MHz,  $\text{CDCl}_3$ ):  $\delta$  0.15 (s, 6H), 0.92 (s, 9H), 2.09 (d,  $J=19\text{Hz}$ , 4H), 3.68 (br s, 2H), 4.01 (br s, 2H), 6.74 (m, 1H), 8.04 (s, 1H), 8.36 (s, 2H);  $^{13}\text{C NMR}$  ( $\text{CDCl}_3$ , 100 MHz):  $\delta$  -5.57, 18.56, 25.91, 26.49, 27.53, 42.12, 62.00, 125.73, 127.29, 132.49, 132.83, 134.79, 141.00, 143.73. IR ( $\text{CHCl}_3$ )  $\nu$  2367, 2331, 1724, 1280, 908,  $734\text{cm}^{-1}$ .

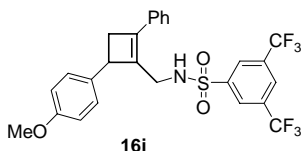

$^1\text{H NMR}$  (400 MHz,  $\text{CDCl}_3$ ):  $\delta$  2.43 (d,  $J=13.1\text{Hz}$ , 1H), 2.94 (dd,  $J=13.1, 4.9\text{Hz}$ , 1H), 3.50 (d,  $J=4.1\text{Hz}$ , 1H), 3.77 (s, 3H), 3.82 (m, 1H), 4.20 (dd,  $J=15.2, 5.5\text{Hz}$ , 1H), 4.88 (t,  $J=5.5\text{Hz}$ , 1H), 6.78 (d,  $J=8.6\text{Hz}$ , 2H), 7.00 (d,  $J=8.7\text{Hz}$ , 2H), 7.24-7.37 (m, 5H), 8.00 (s, 1H), 8.20 (s, 2H);  $^{13}\text{C NMR}$  ( $\text{CDCl}_3$ , 100 MHz):  $\delta$  37.02, 40.47, 43.20, 55.16, 114.23, 126.15, 126.25, 127.29, 127.35 (d,  $^1J=240.3\text{Hz}$ ), 127.56, 128.38, 132.54, 132.82, 132.88, 136.18, 133.57, 142.89, 143.09, 158.57. IR ( $\text{CHCl}_3$ )  $\nu$  3278, 2839, 2256, 1358,  $729\text{cm}^{-1}$ . HRMS (ESI)  $m/z$  calcd for  $\text{C}_{26}\text{H}_{21}\text{F}_6\text{NO}_3\text{S}$  ( $\text{M}+\text{Na}$ ) $^+$  564.1039, found 564.1041.

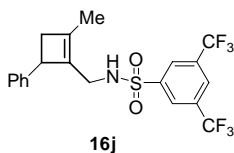

$^1\text{H NMR}$  (400 MHz,  $\text{CDCl}_3$ ):  $\delta$  1.74 (s, 3H), 2.12 (d,  $J=13.5\text{Hz}$ , 1H), 2.58 (dd,  $J=17.7, 4.5\text{Hz}$ , 1H), 3.35 (s, 1H), 3.53 (dd,  $J=20.5, 5.5\text{Hz}$ , 1H), 3.79 (dd,  $J=14.8, 5.3\text{Hz}$ , 1H), 4.52 (t,  $J=5.6\text{Hz}$ , 1H), 6.99 (m, 2H), 7.14-7.26 (m, 3H), 8.04 (s, 1H), 8.21 (s, 2H);  $^{13}\text{C NMR}$  ( $\text{CDCl}_3$ , 100 MHz):  $\delta$  13.92, 39.98, 40.41, 44.48, 122.44 (d,  $^1J=274.1\text{Hz}$ ), 126.06, 126.31, 126.74, 127.24, 128.71, 132.75 (d,  $^2J=34.6\text{Hz}$ ), 136.23, 141.43, 143.22, 144.10. IR ( $\text{CHCl}_3$ )  $\nu$  3296, 2916, 1359, 1278, 1141, 906,  $712\text{cm}^{-1}$ . HRMS (ESI)  $m/z$  calcd for  $\text{C}_{20}\text{H}_{17}\text{F}_6\text{NO}_2\text{S}$  ( $\text{M}+\text{Na}$ ) $^+$  472.0776, found 472.0761.



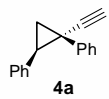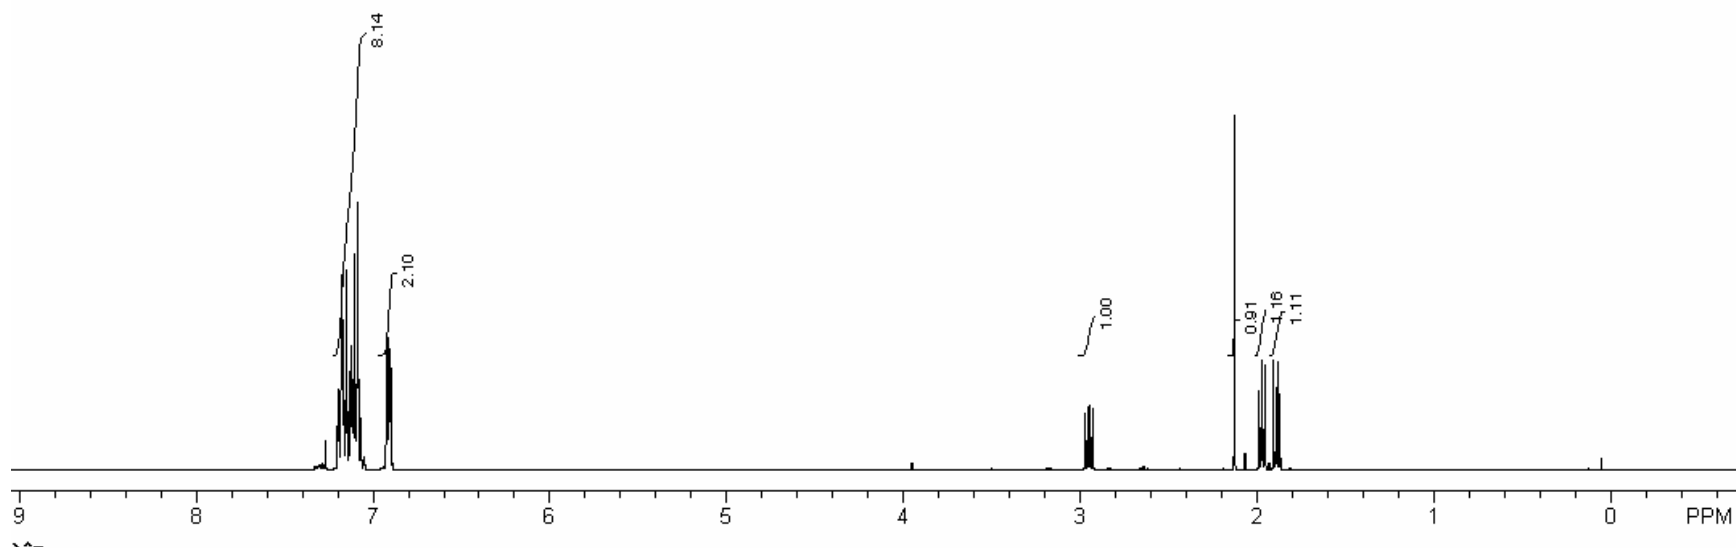

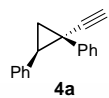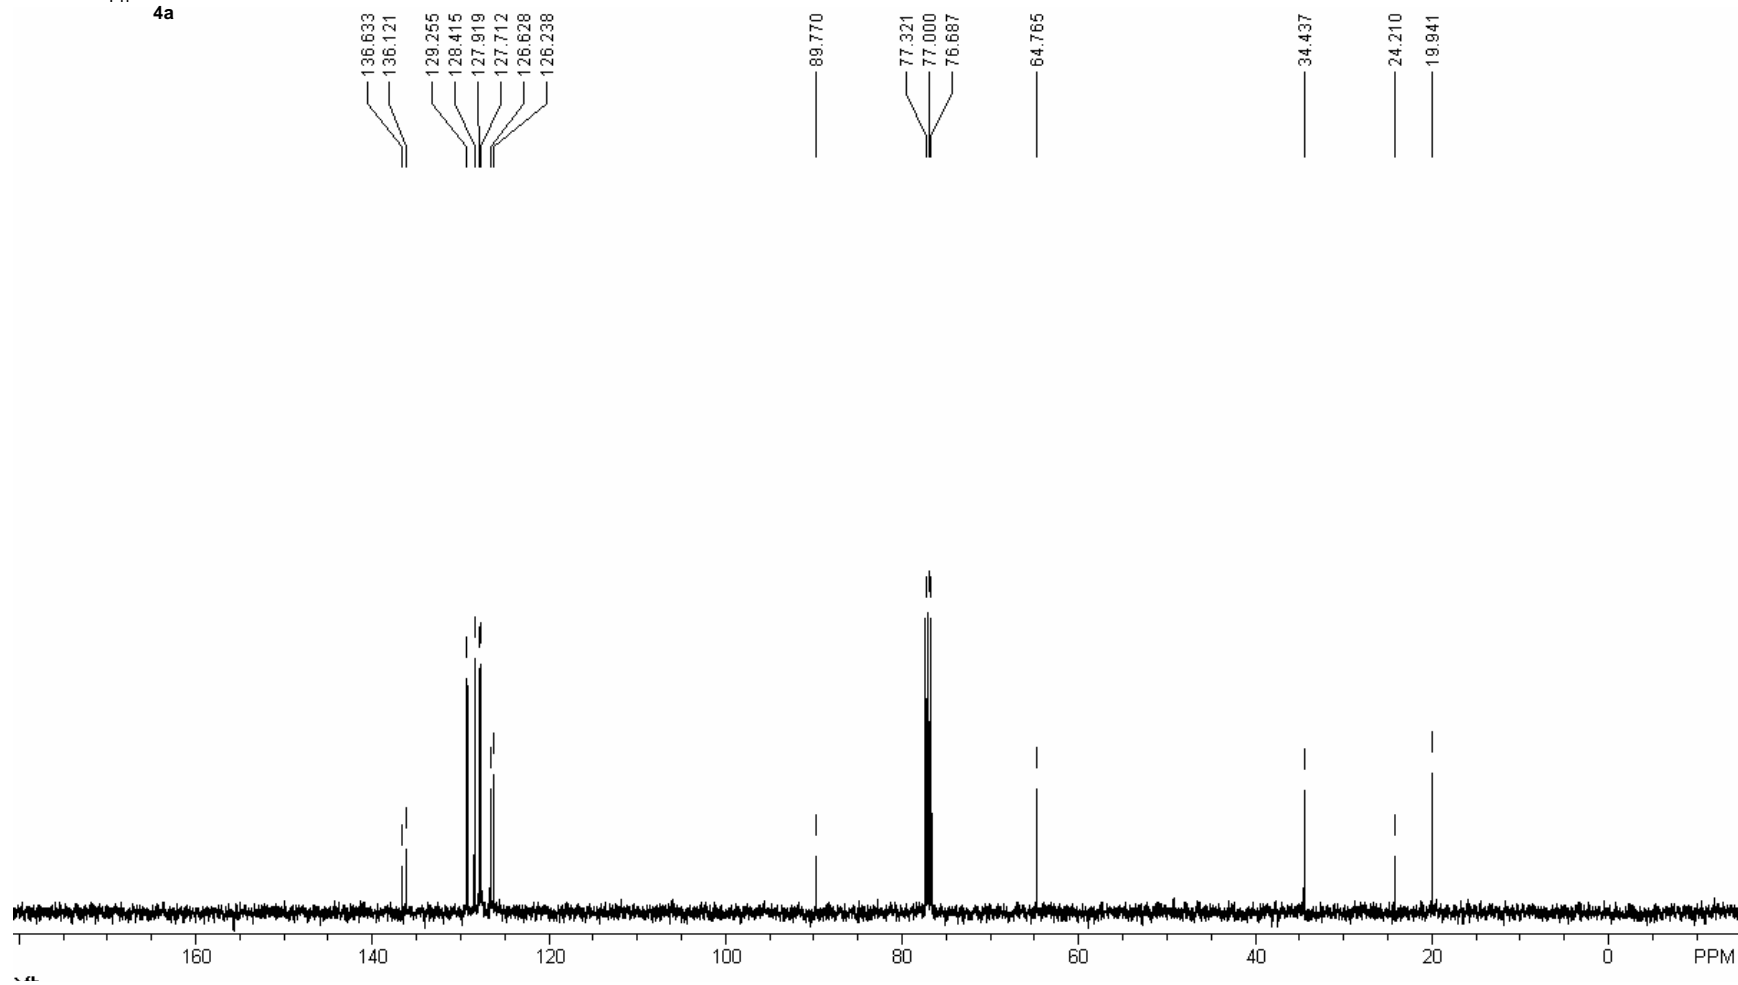

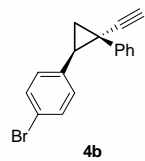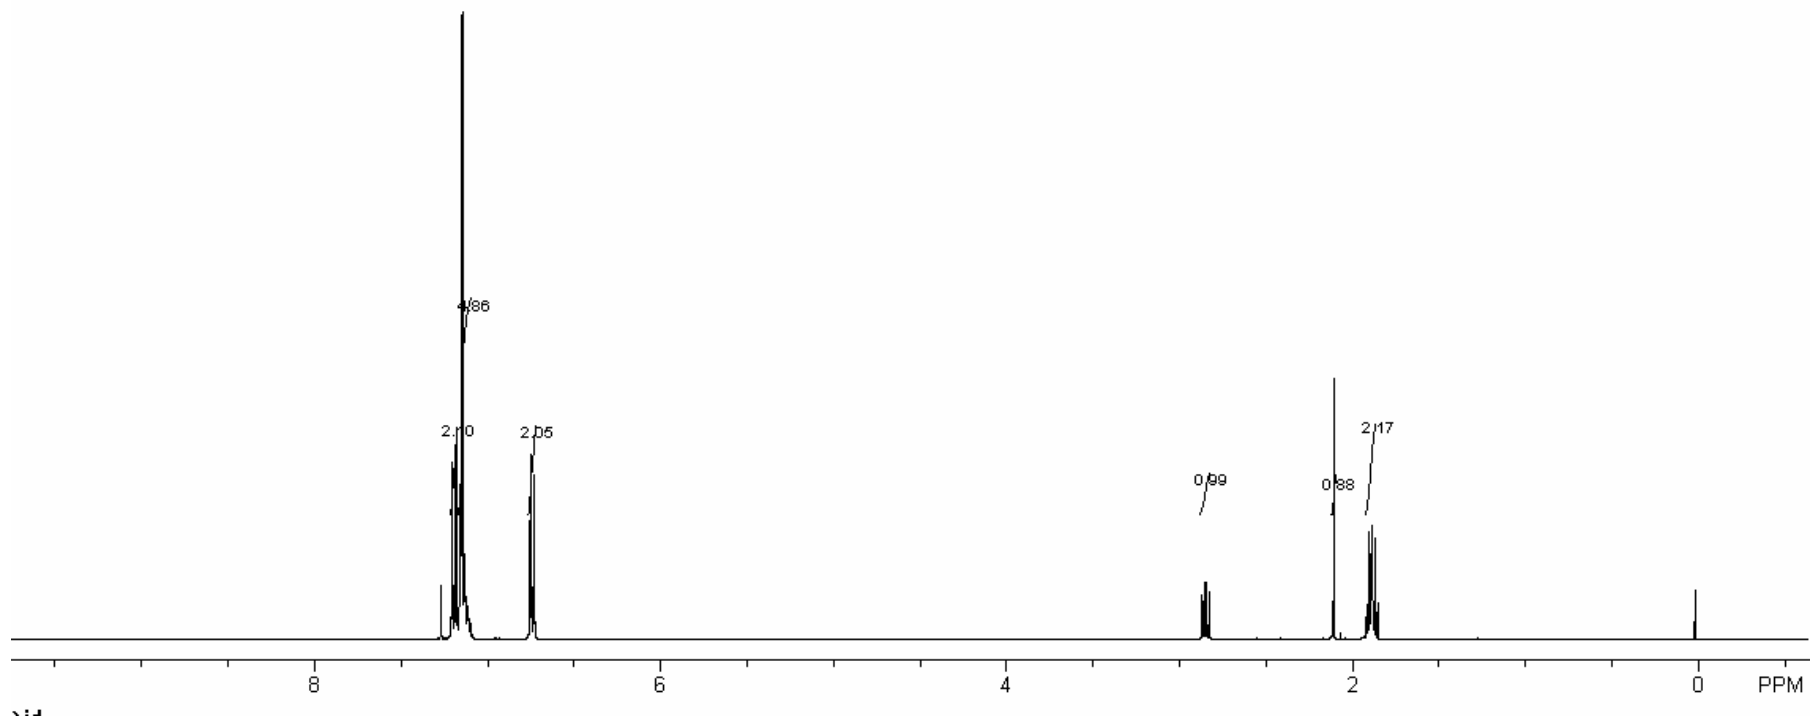

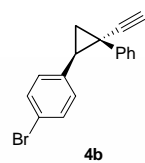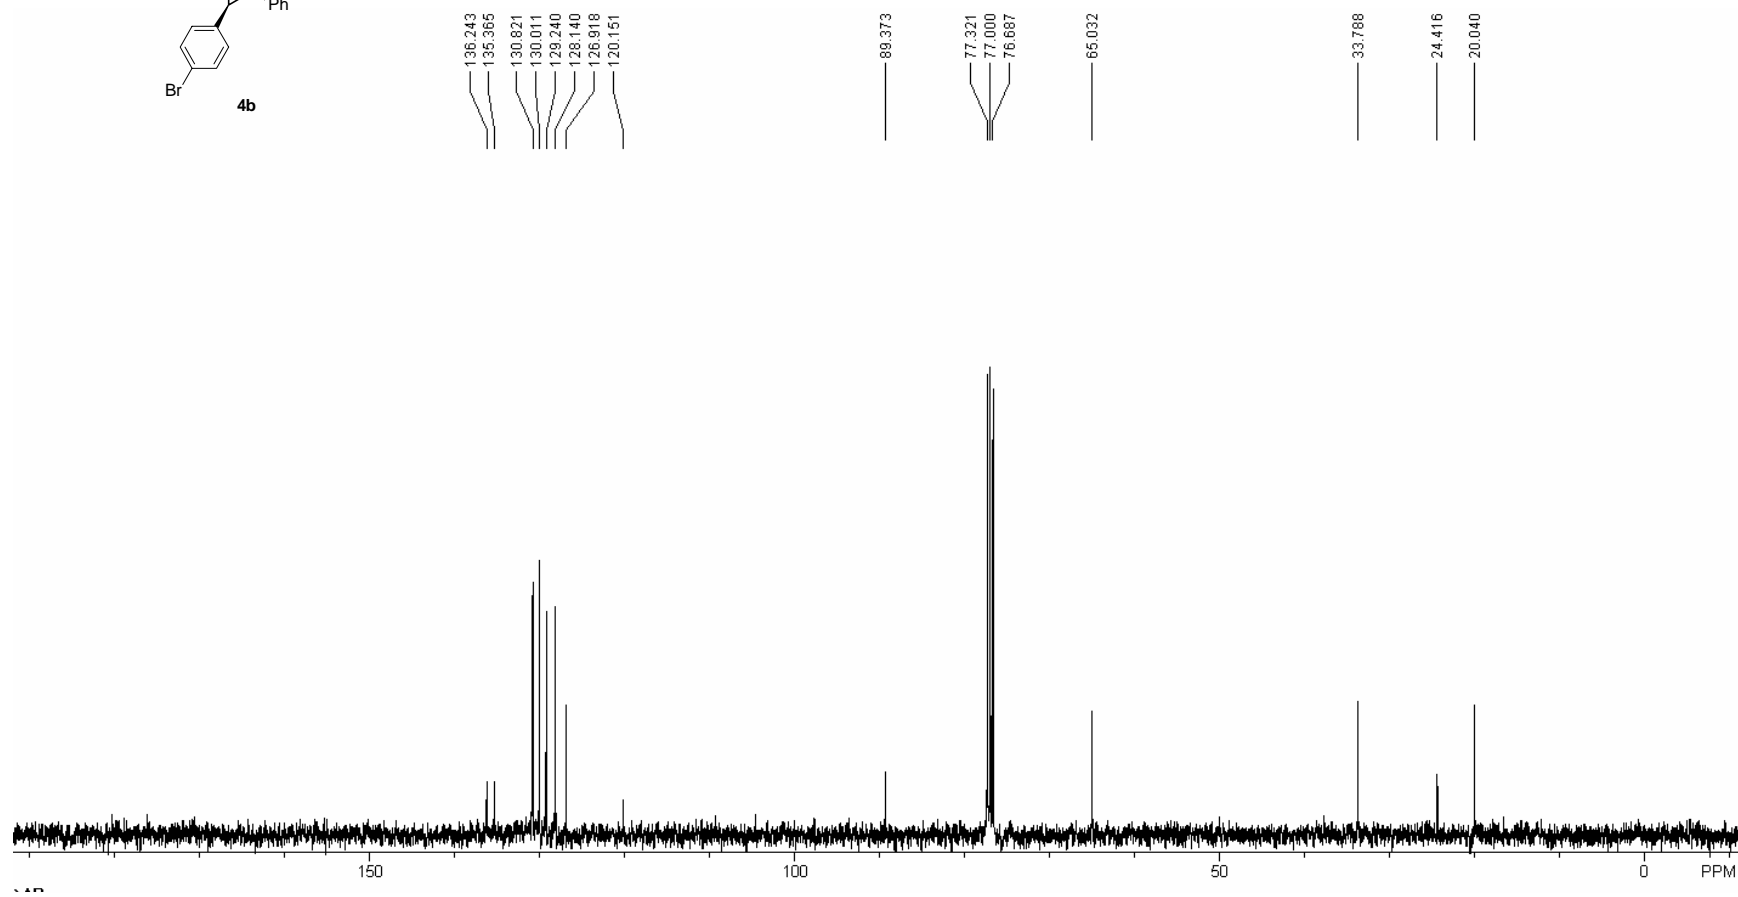

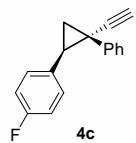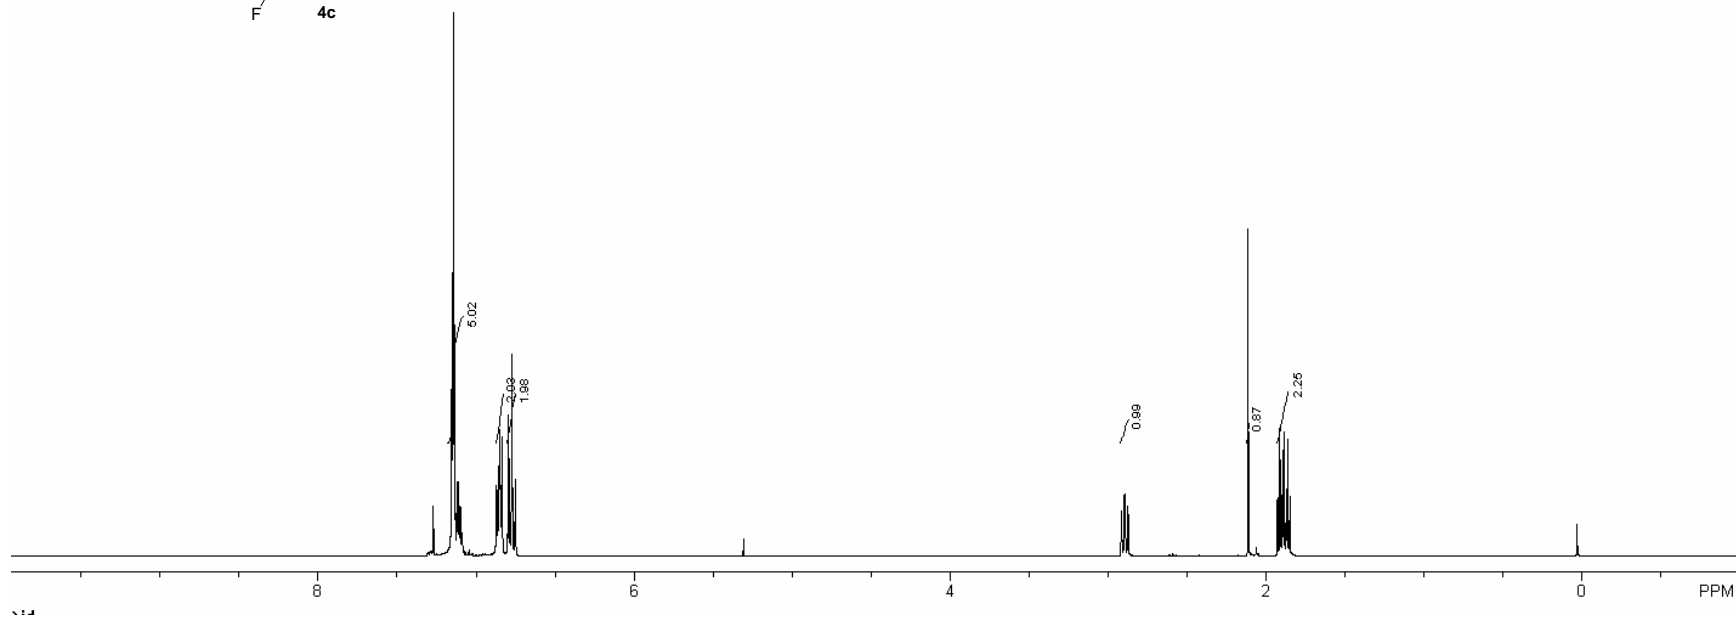

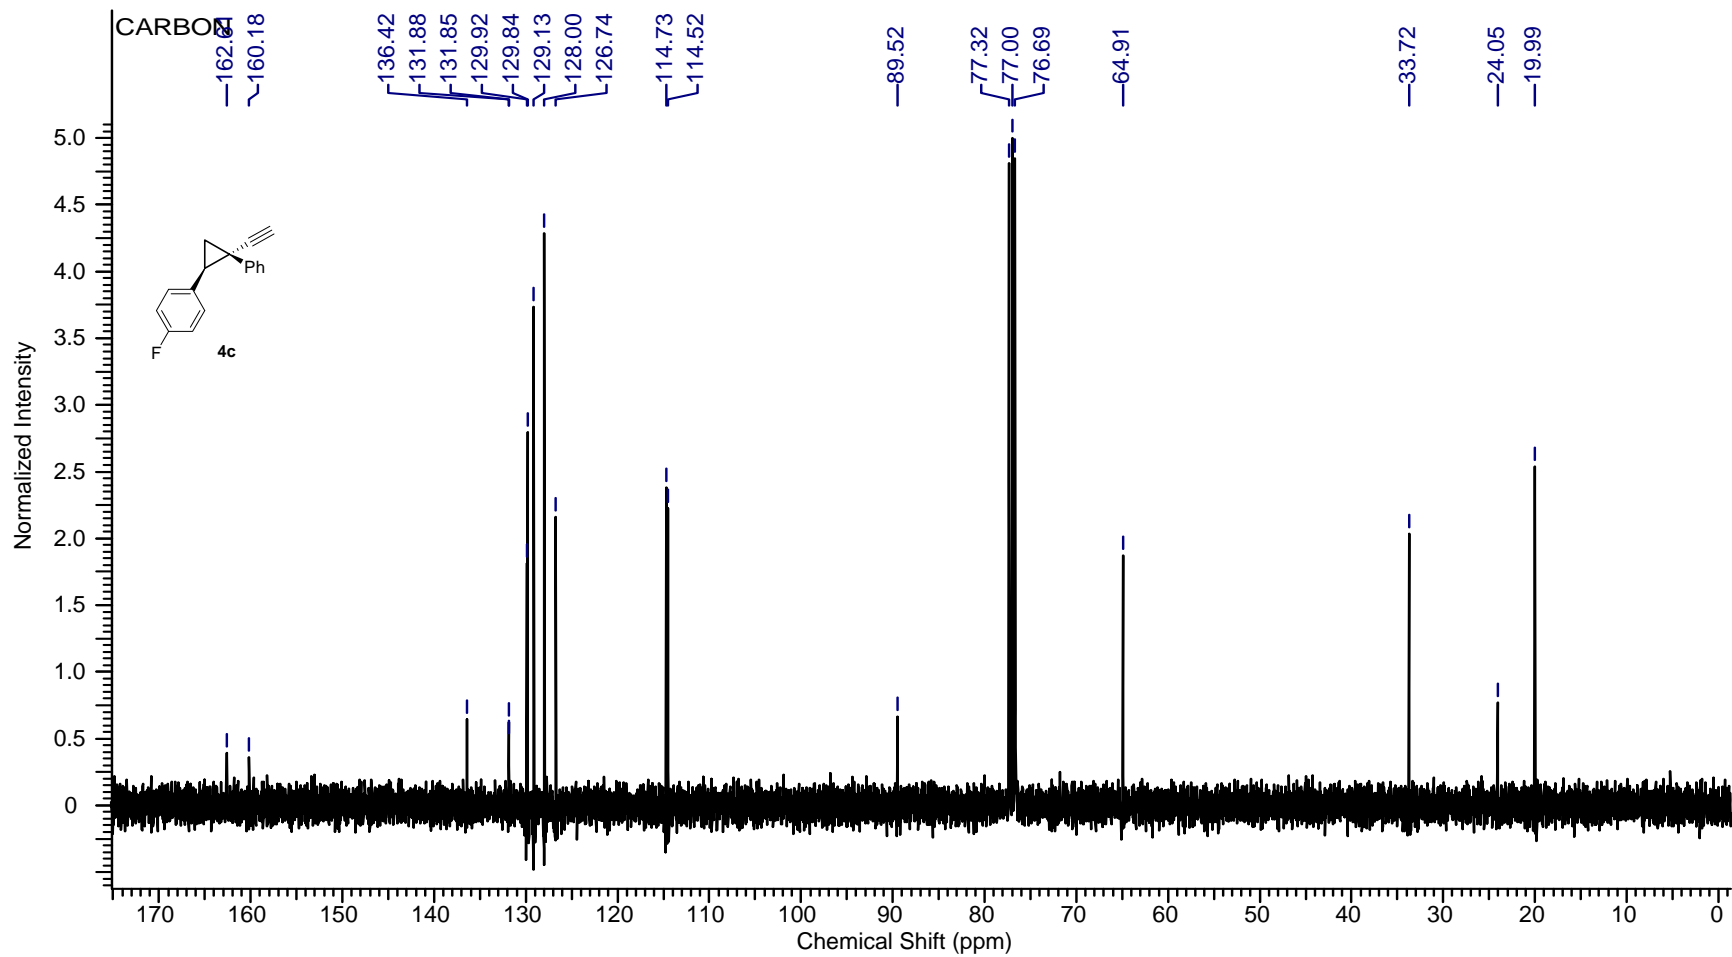

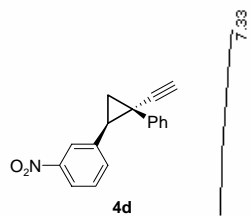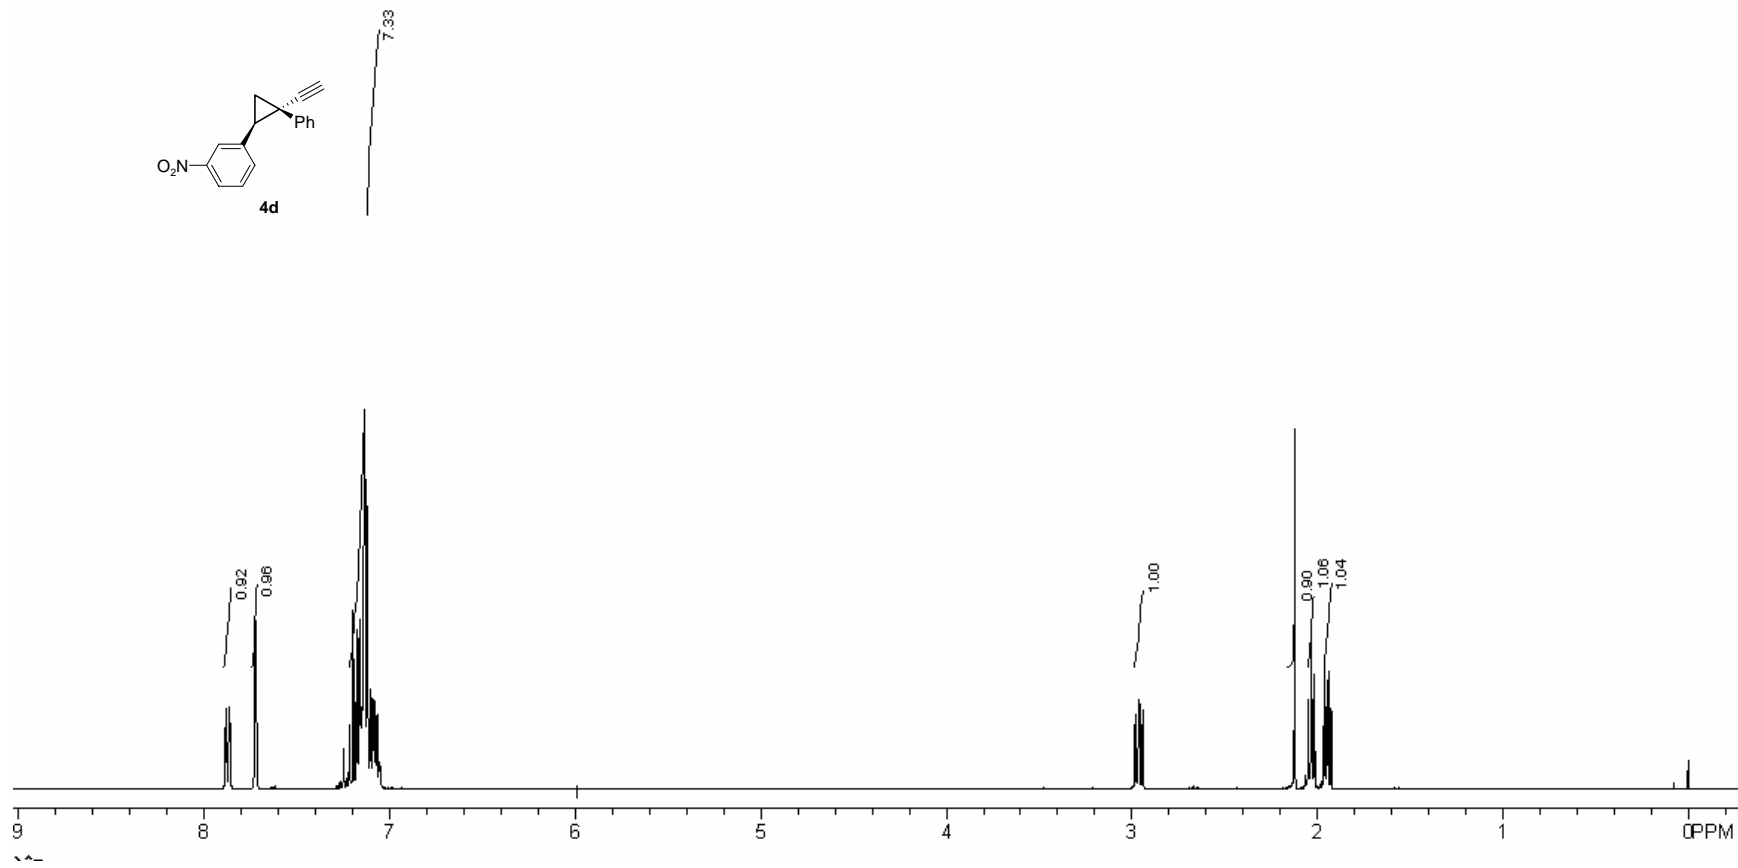

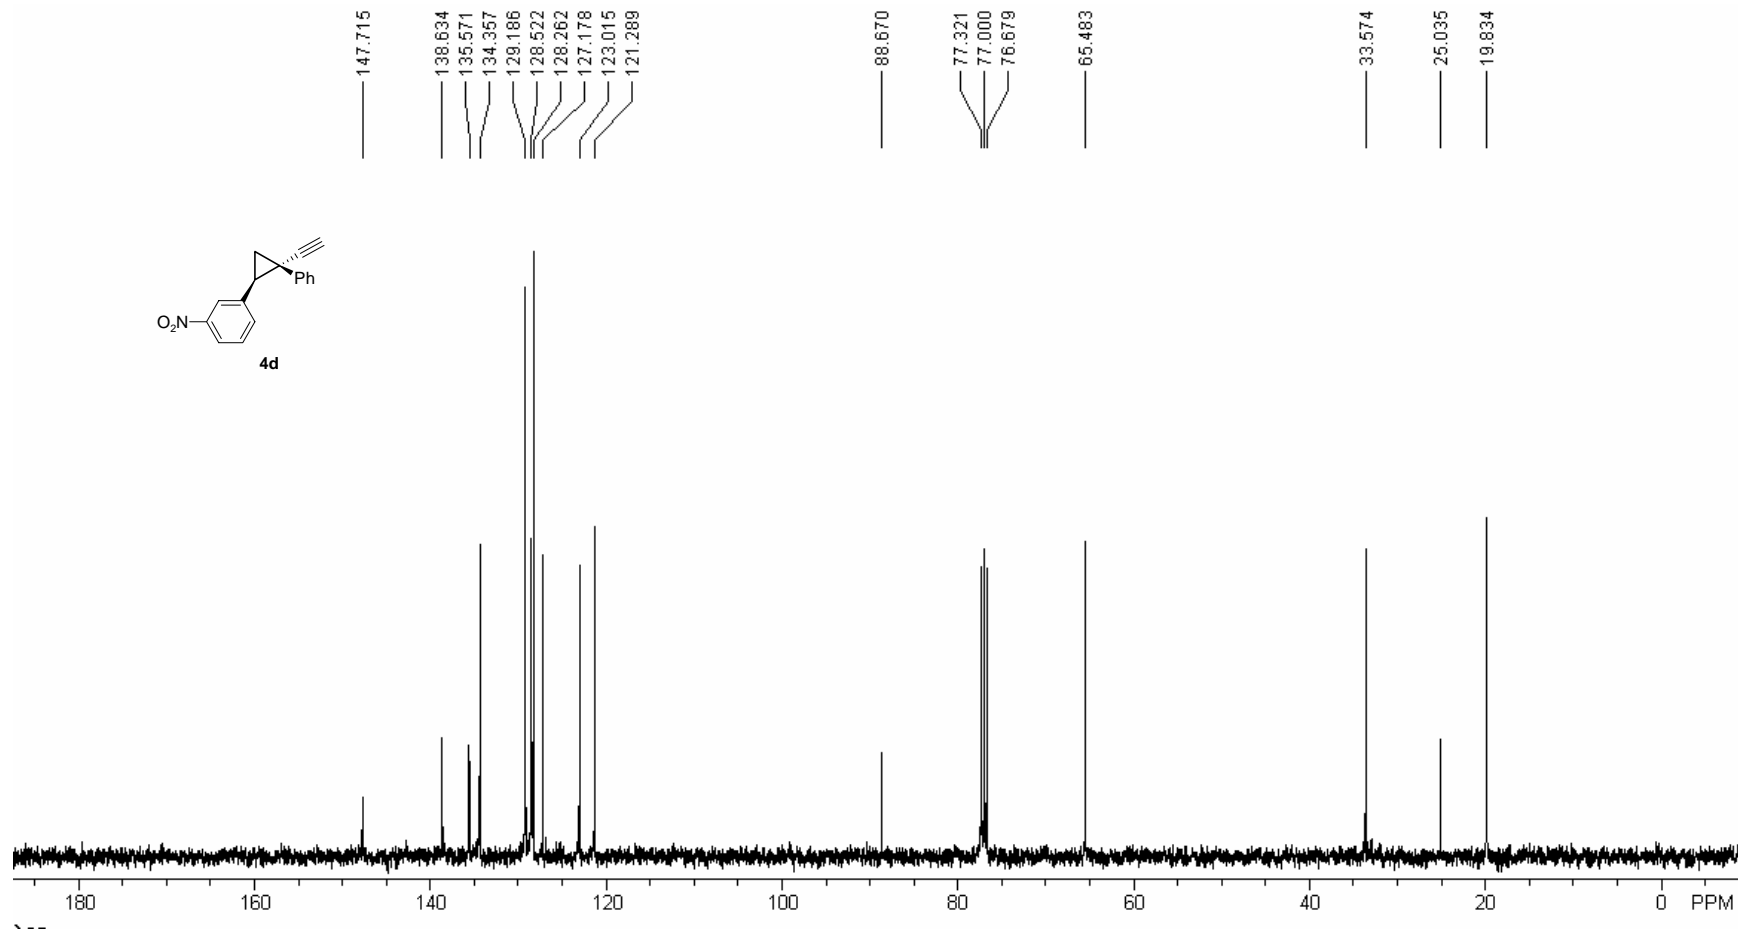



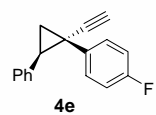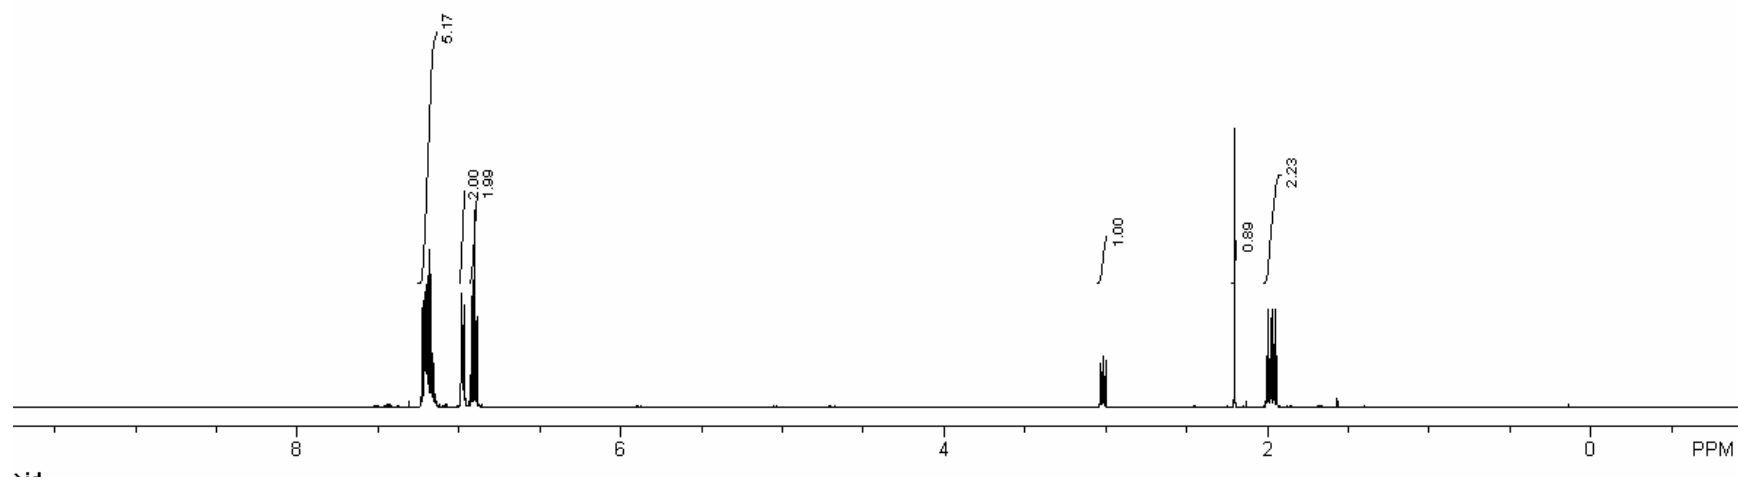

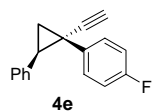

162.68  
160.73  
136.07  
132.78  
132.75  
131.12  
131.06  
128.55  
128.04  
126.60  
115.10  
114.93

89.68  
89.67  
77.48  
77.23  
76.98  
65.23

34.50  
23.76  
20.21

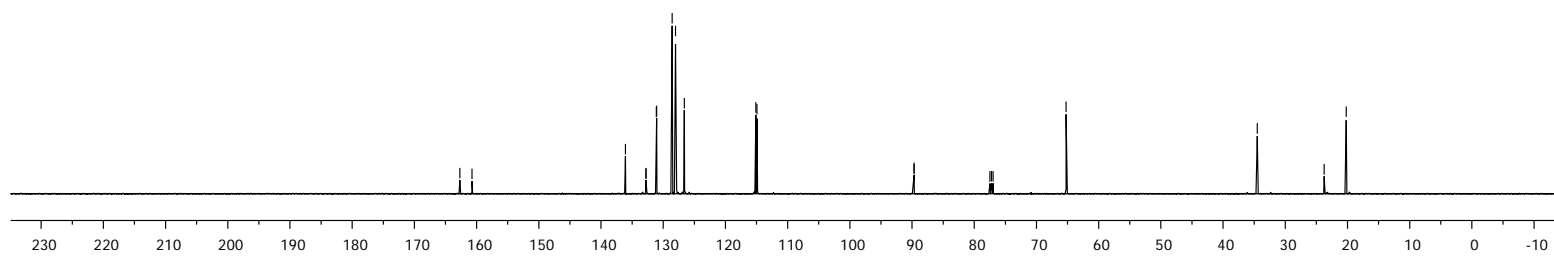

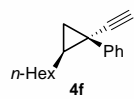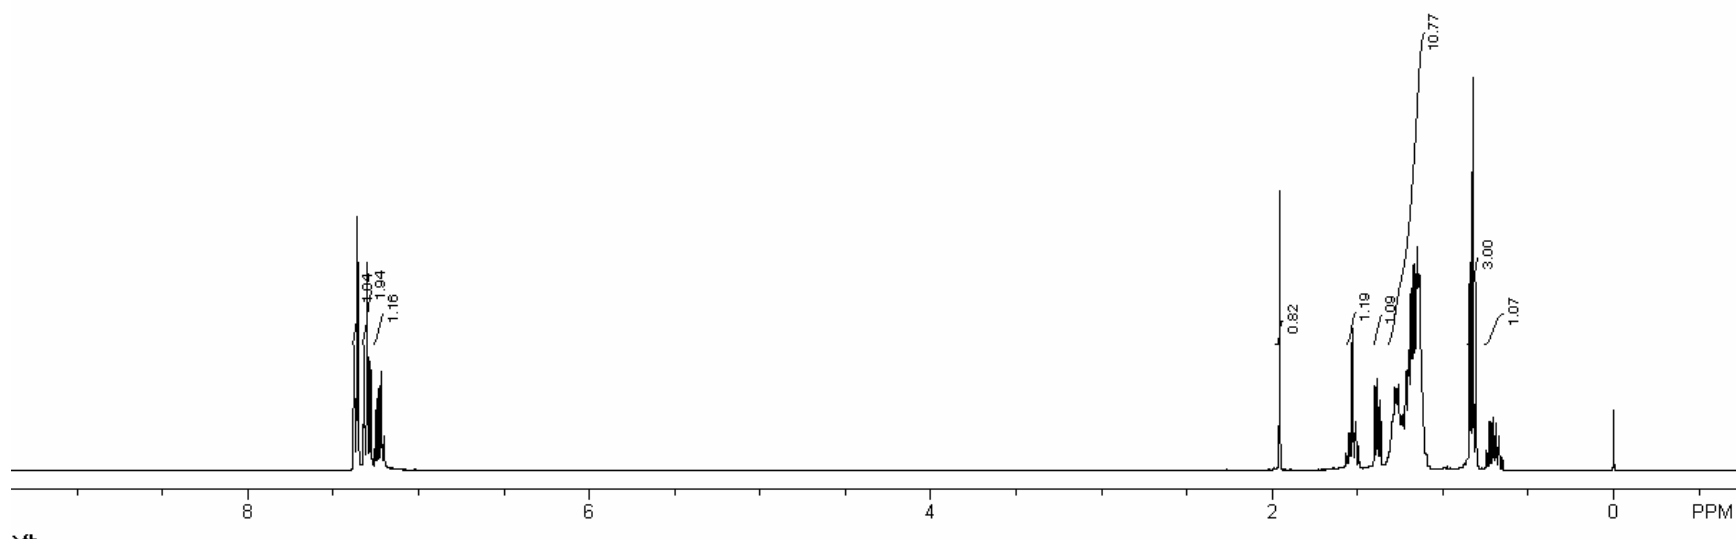

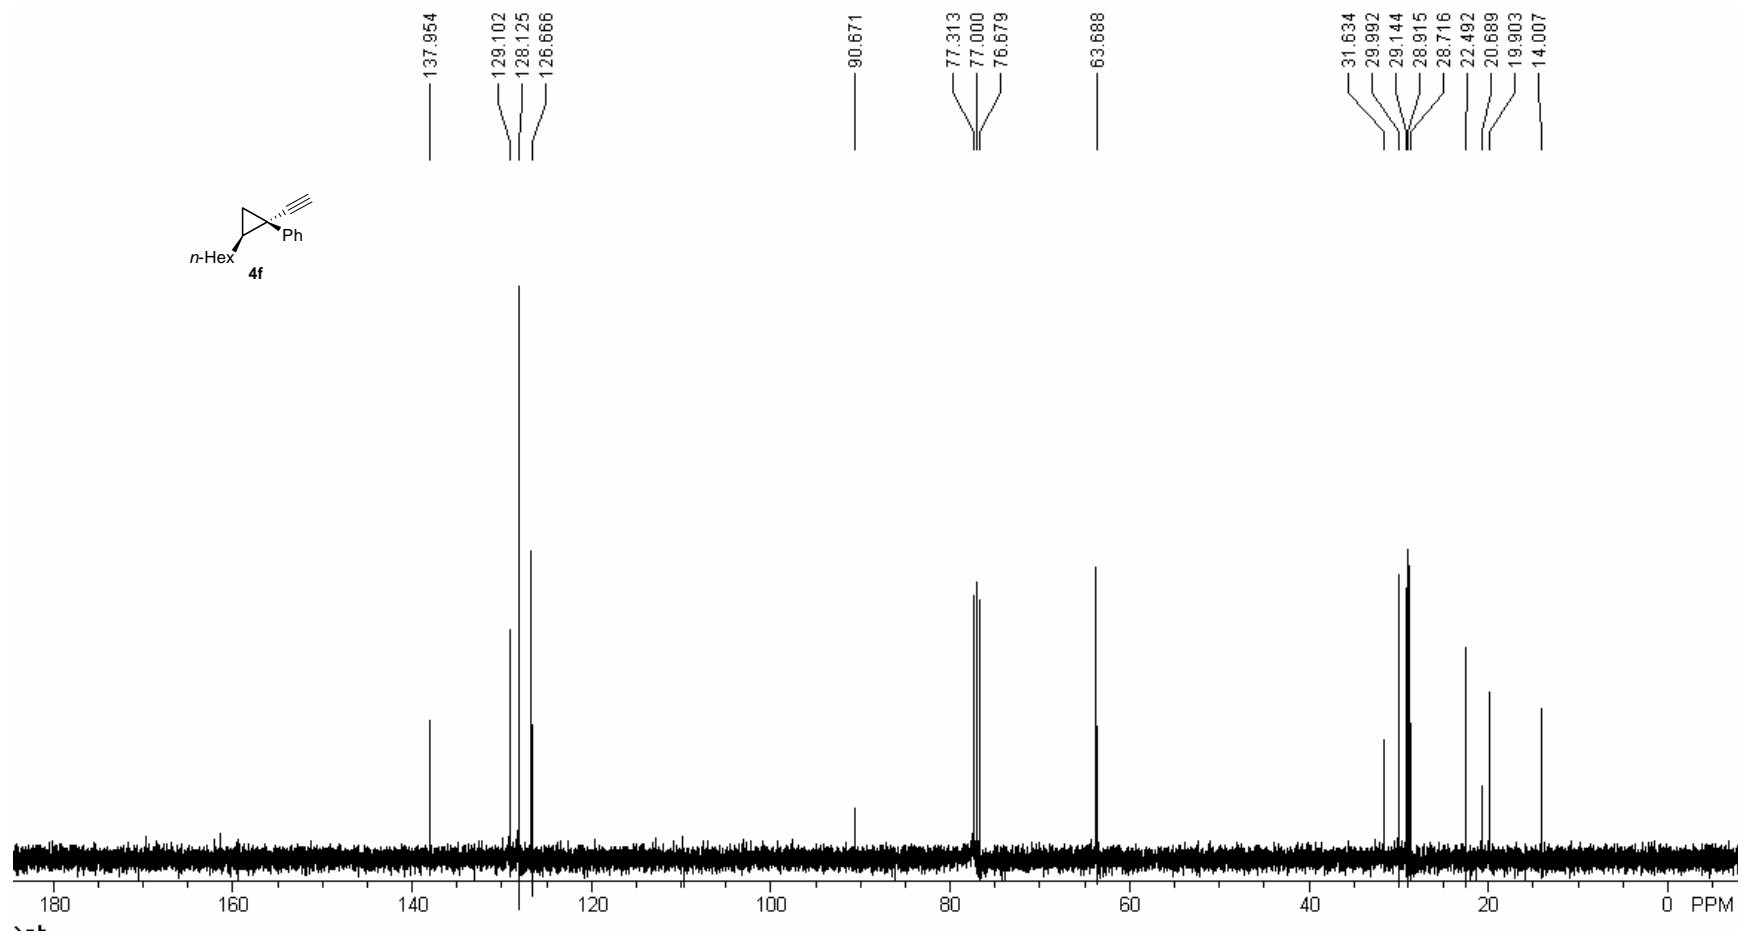

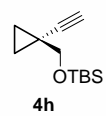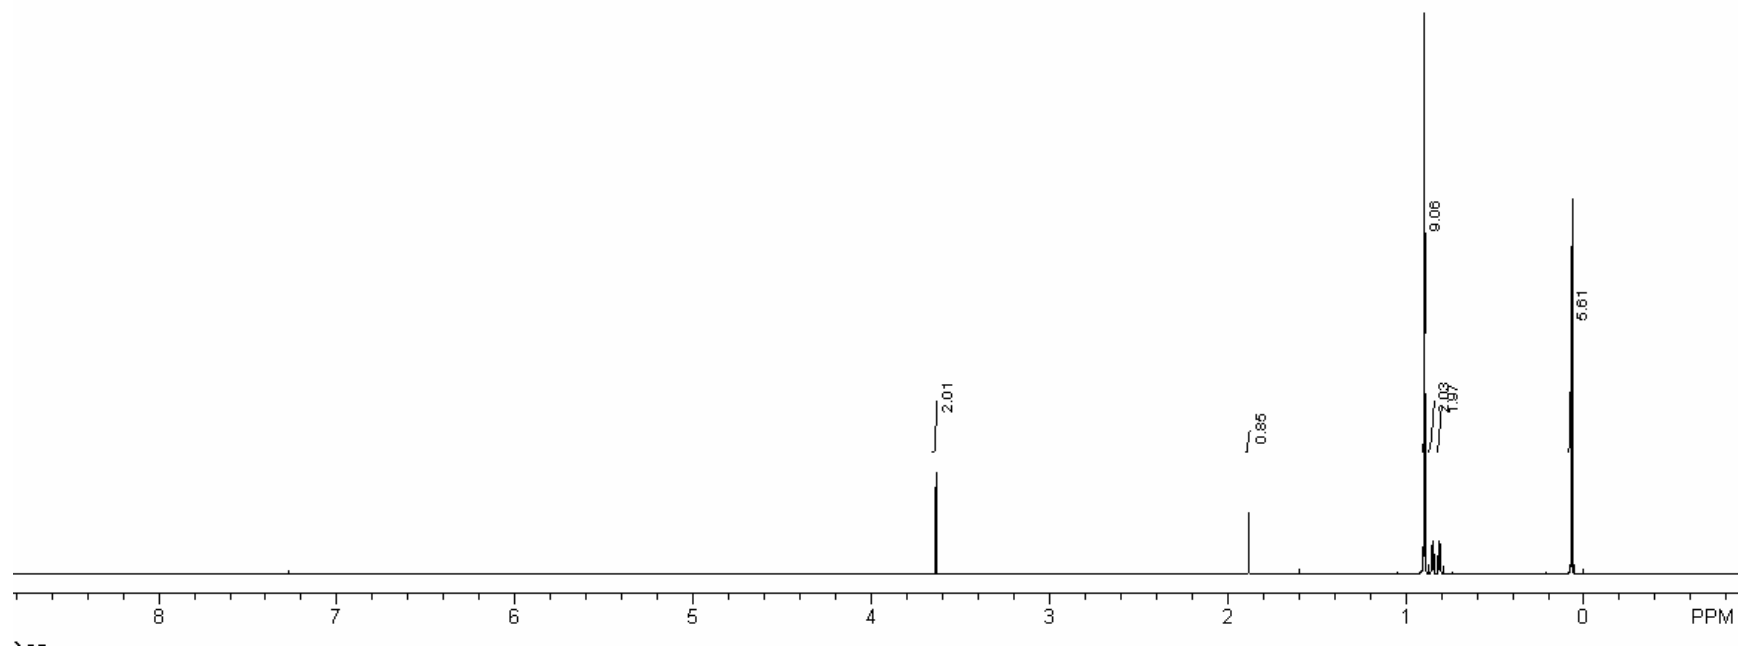

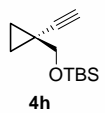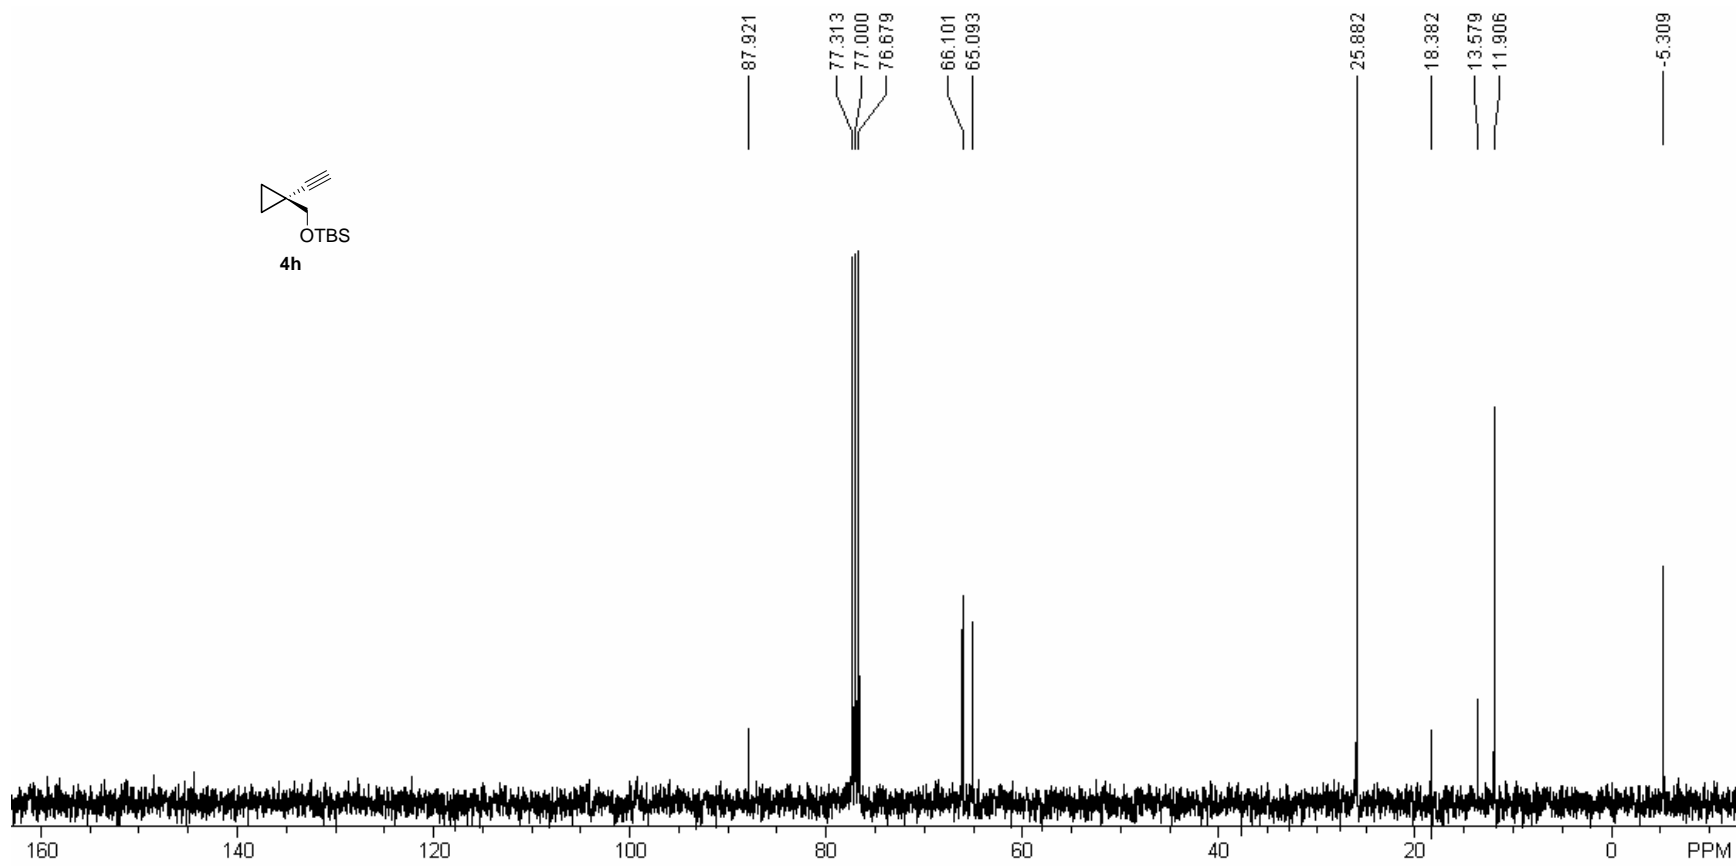

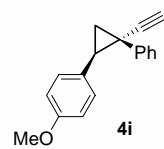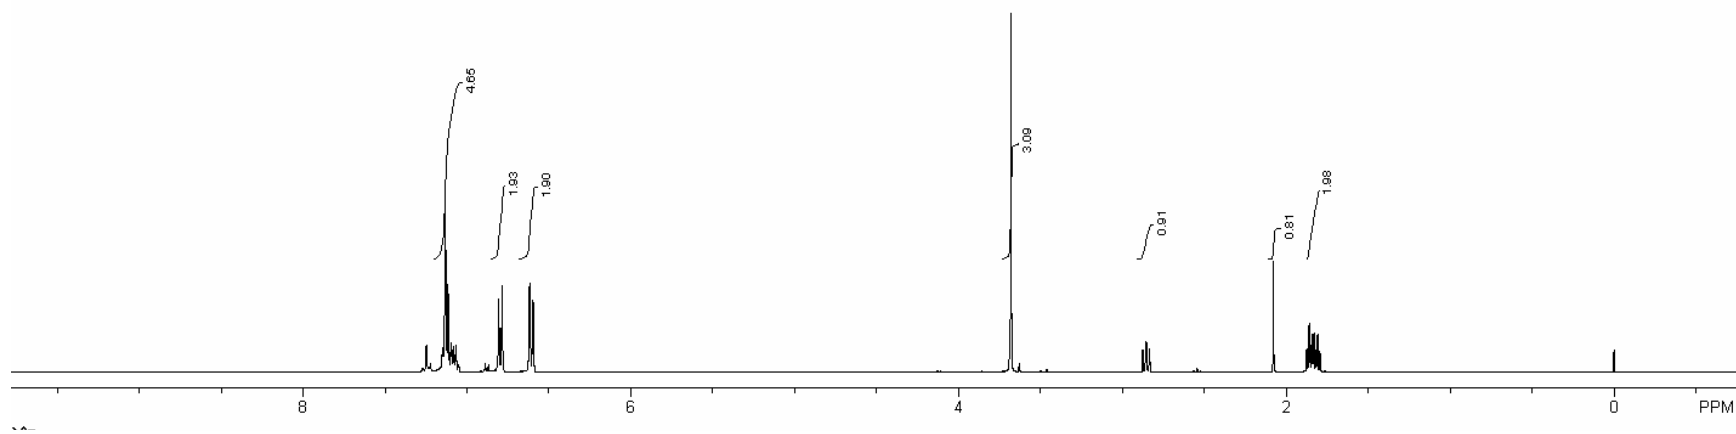

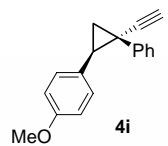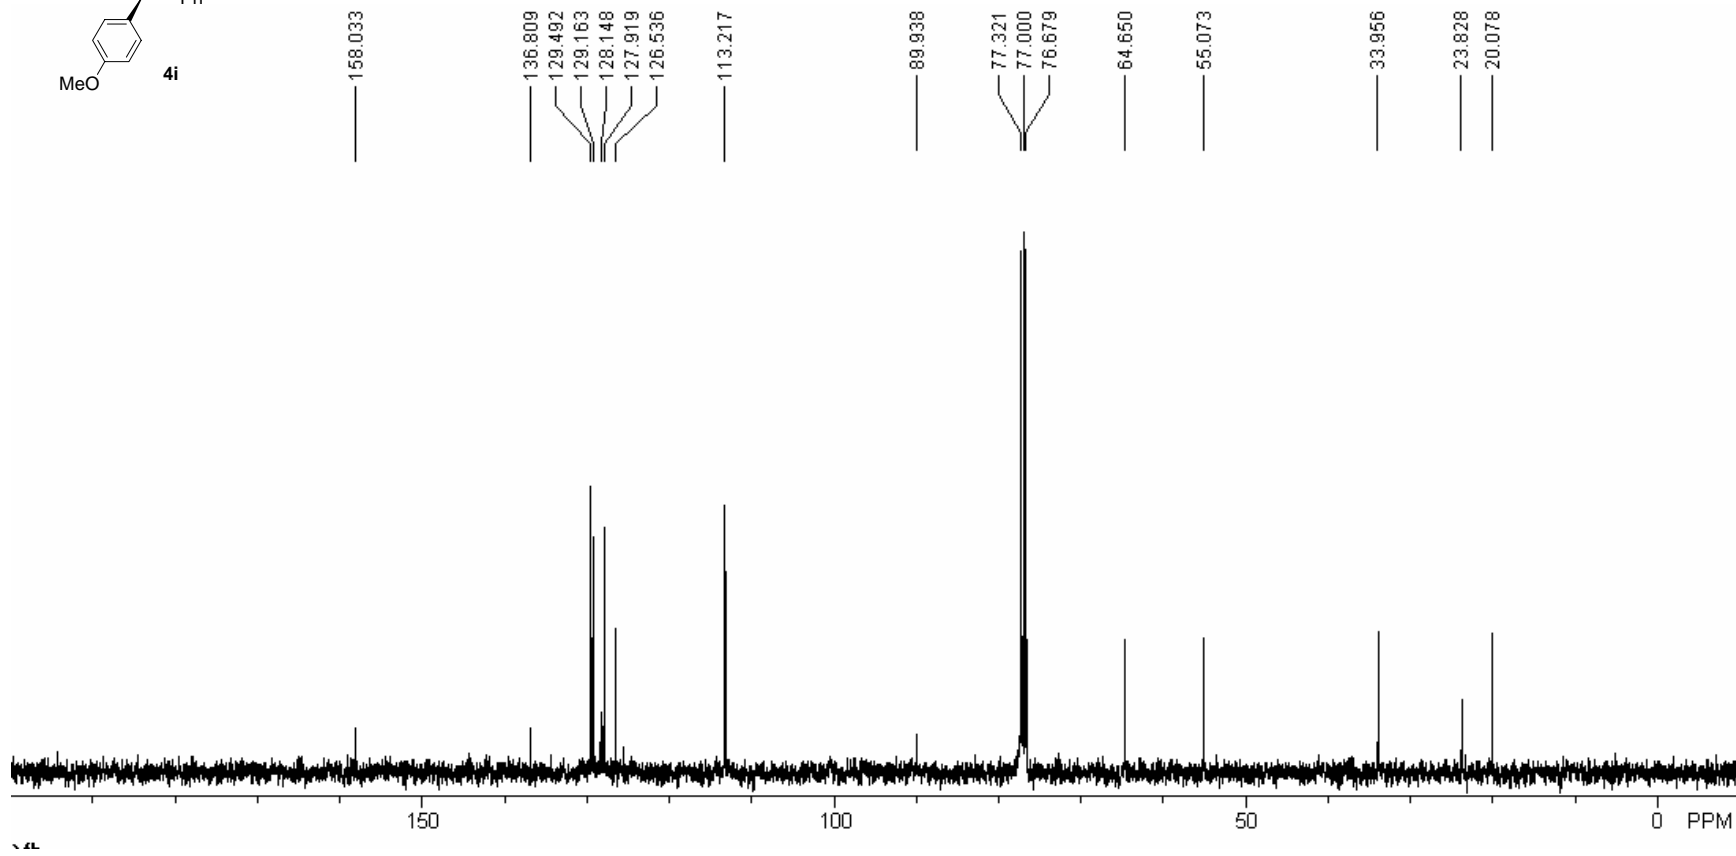



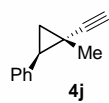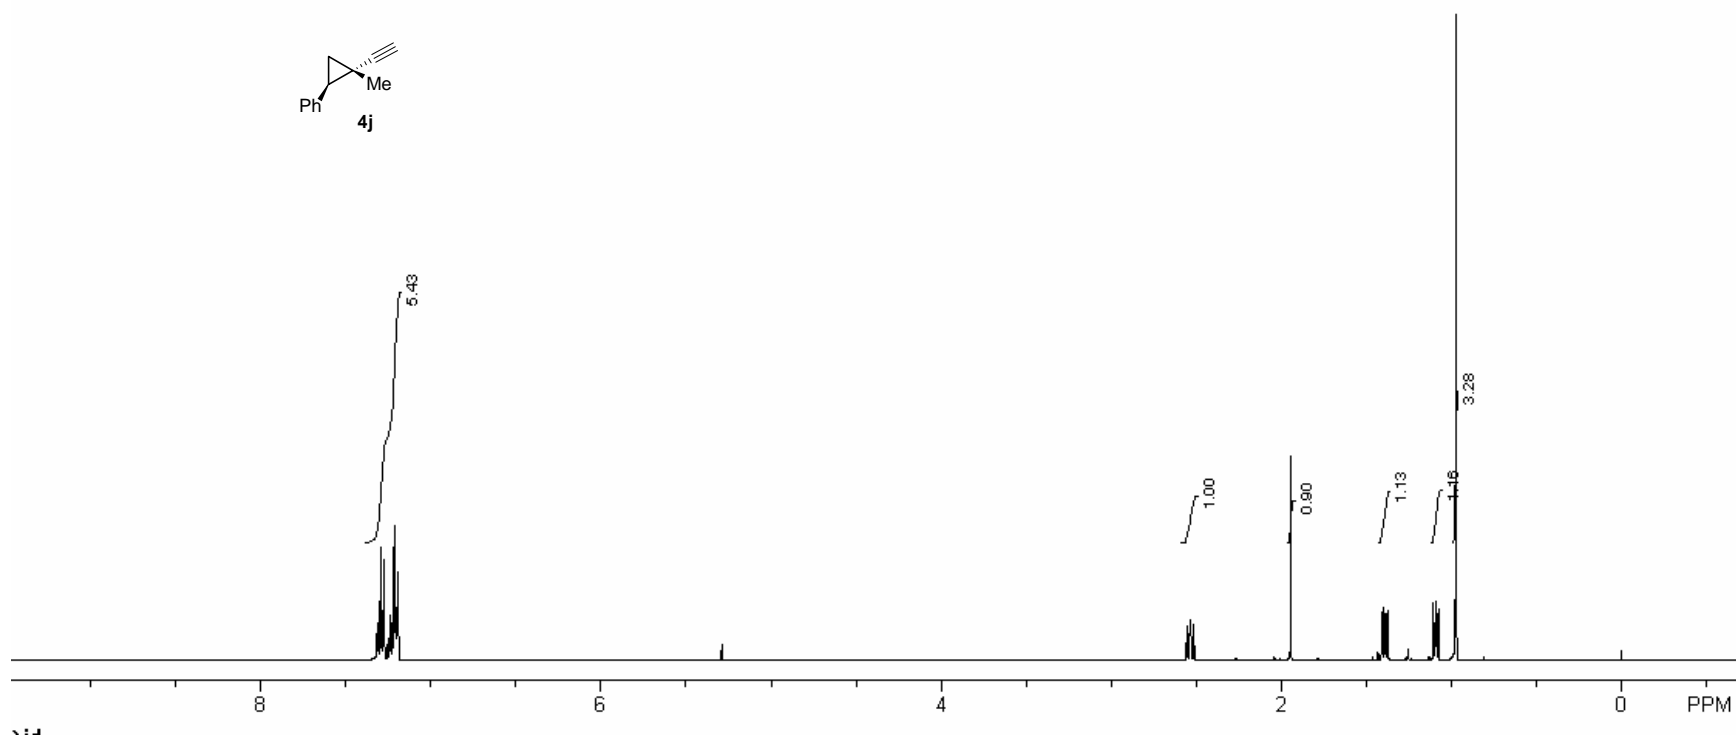

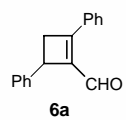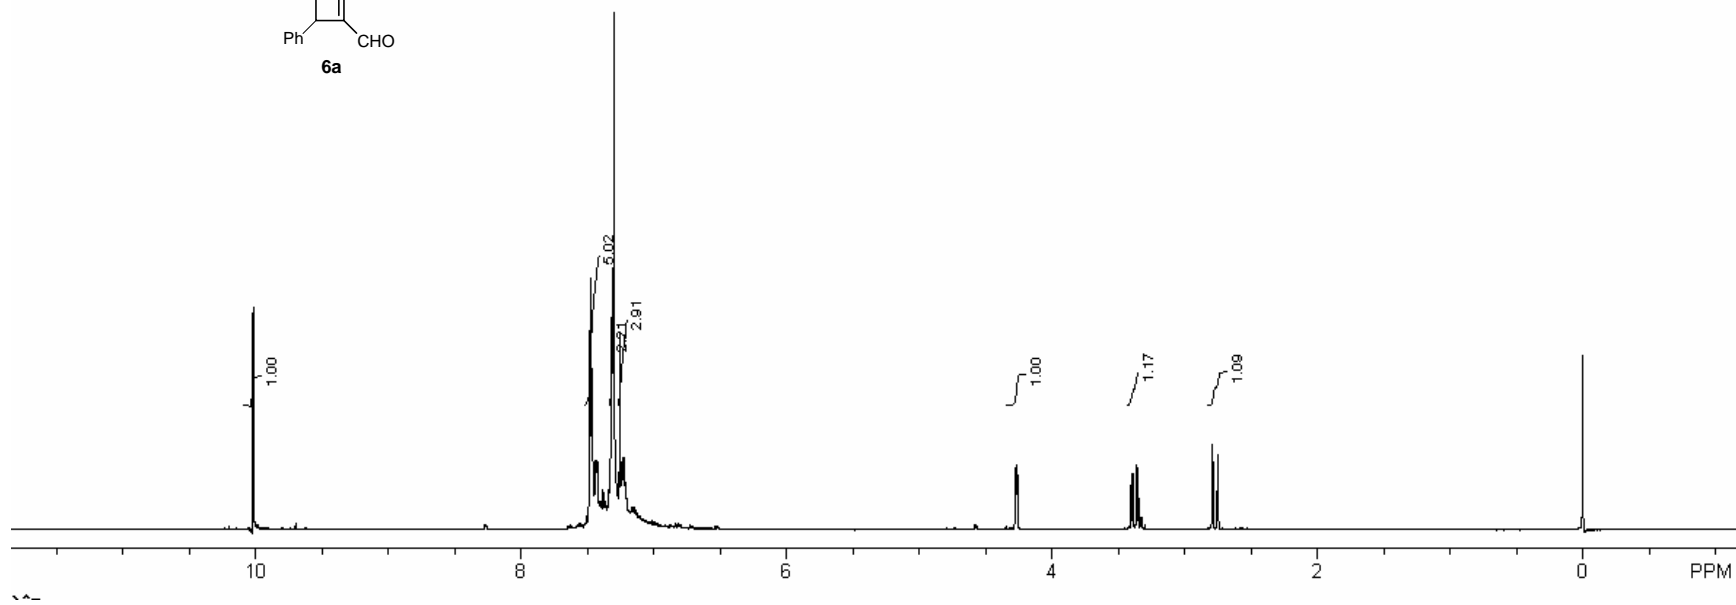

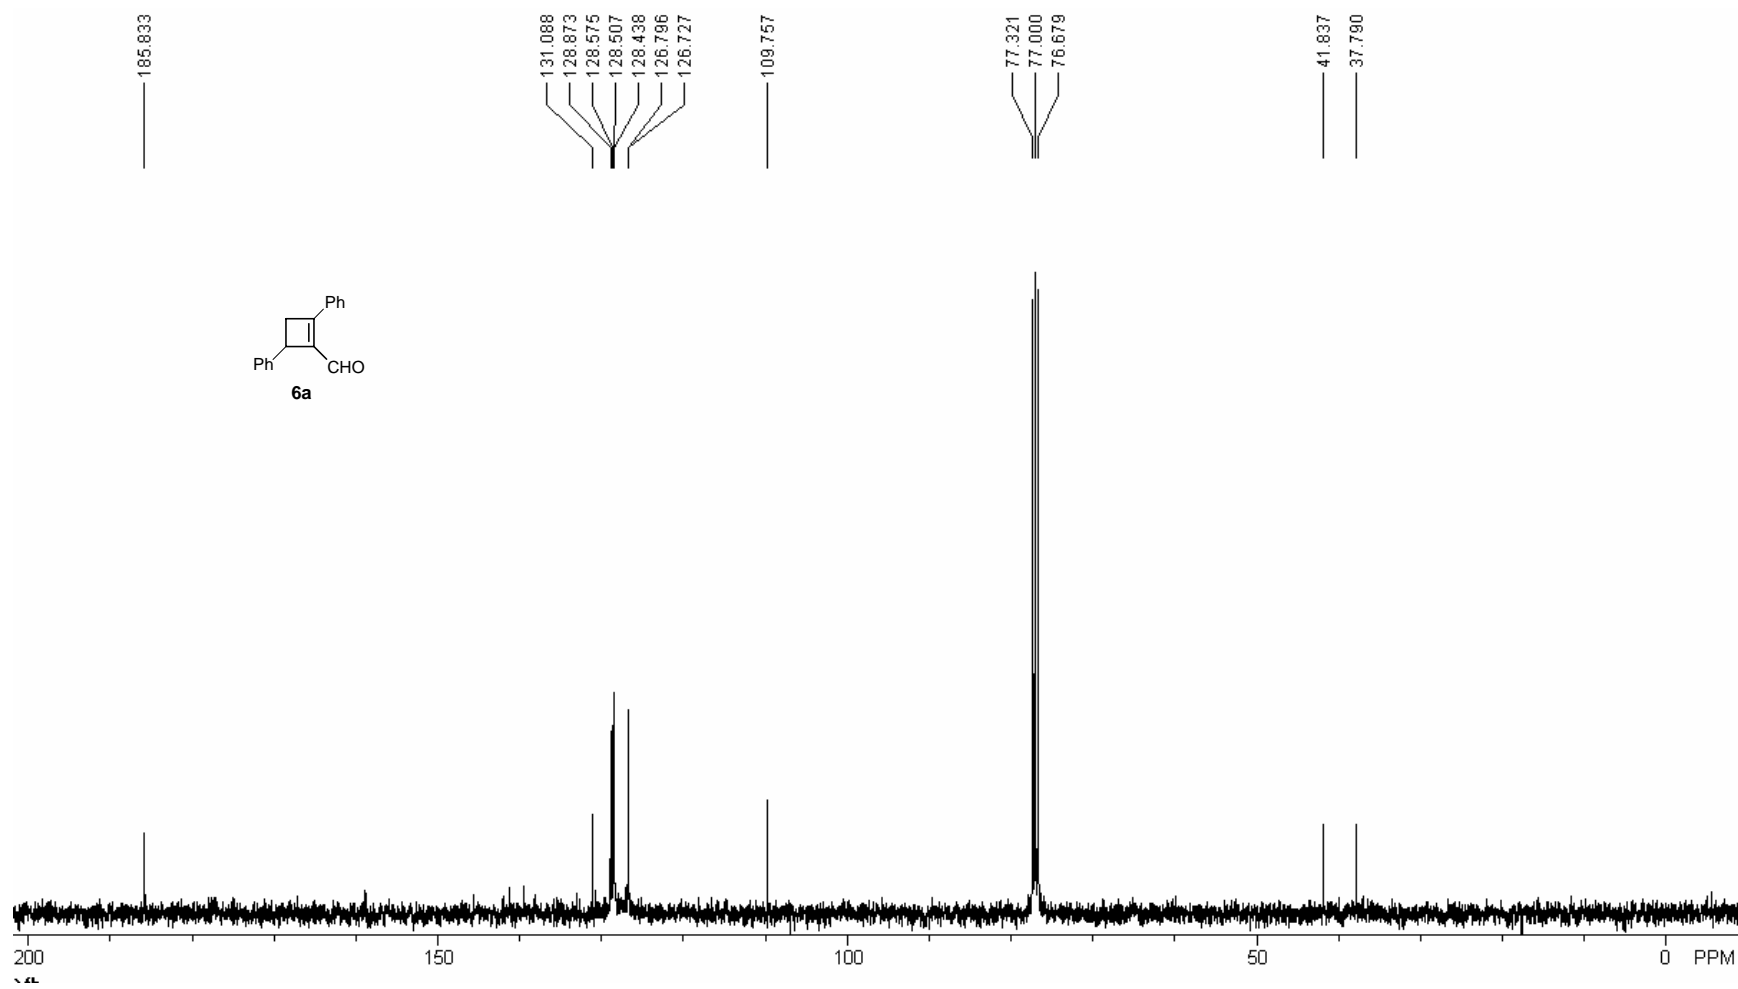

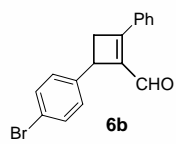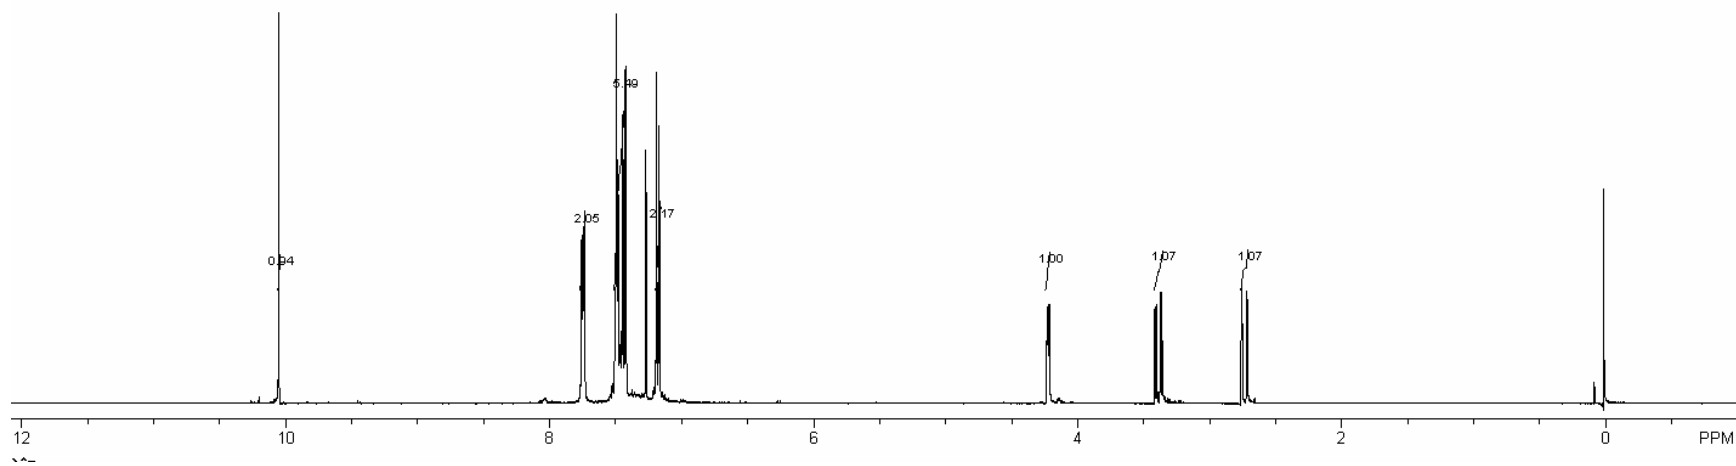

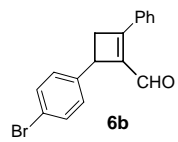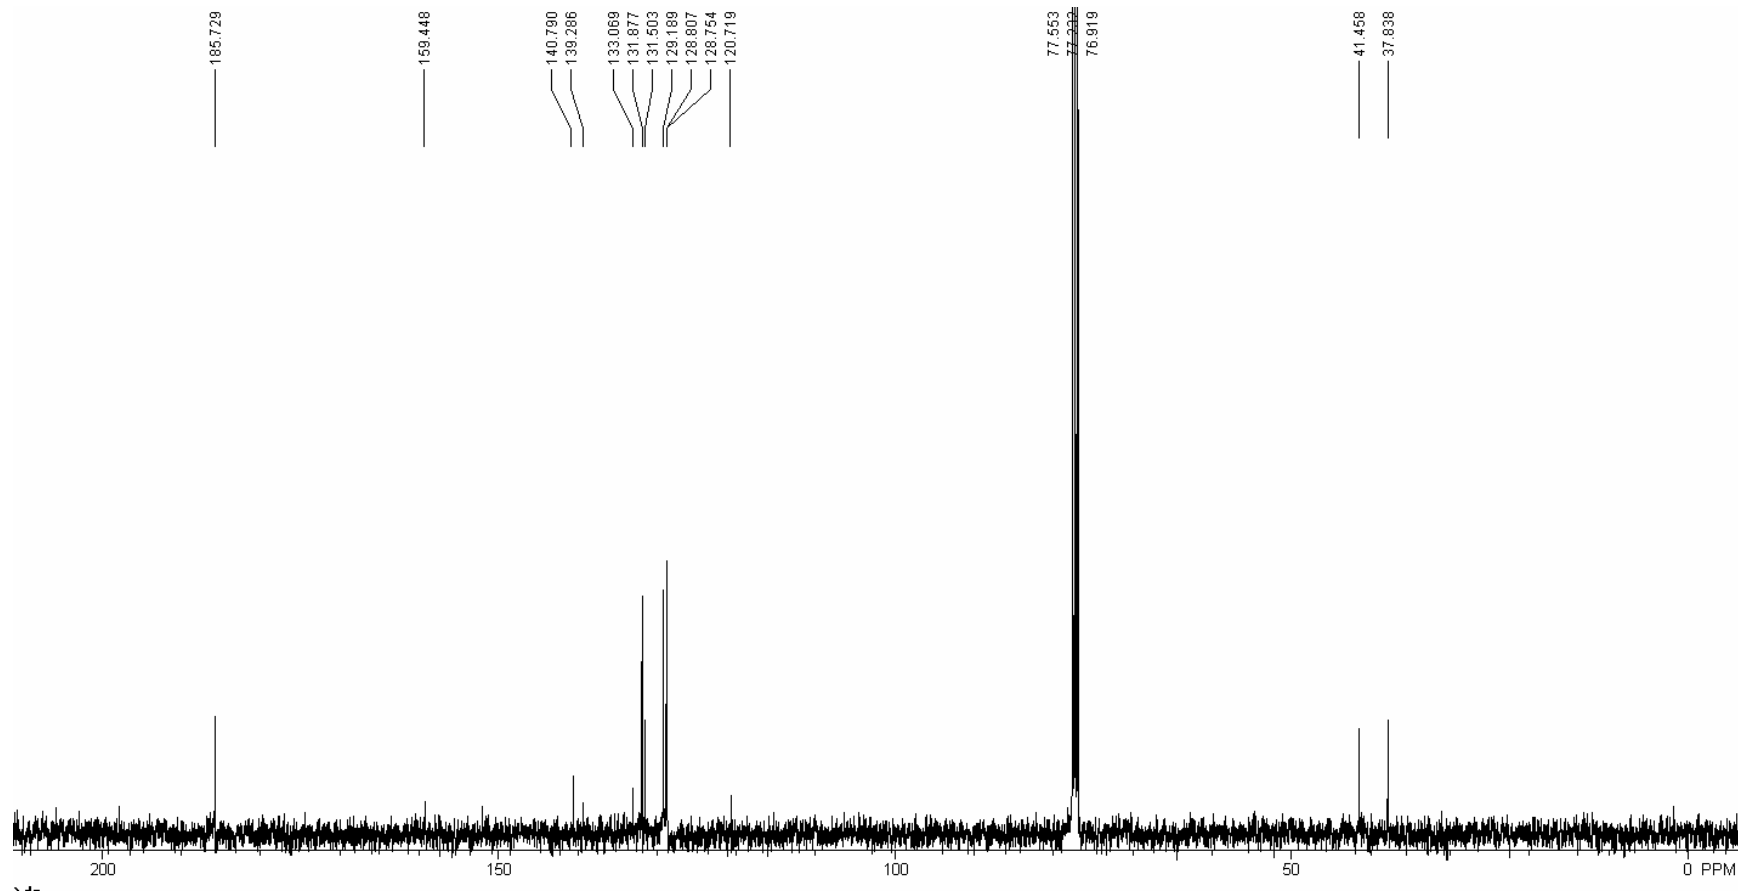

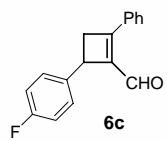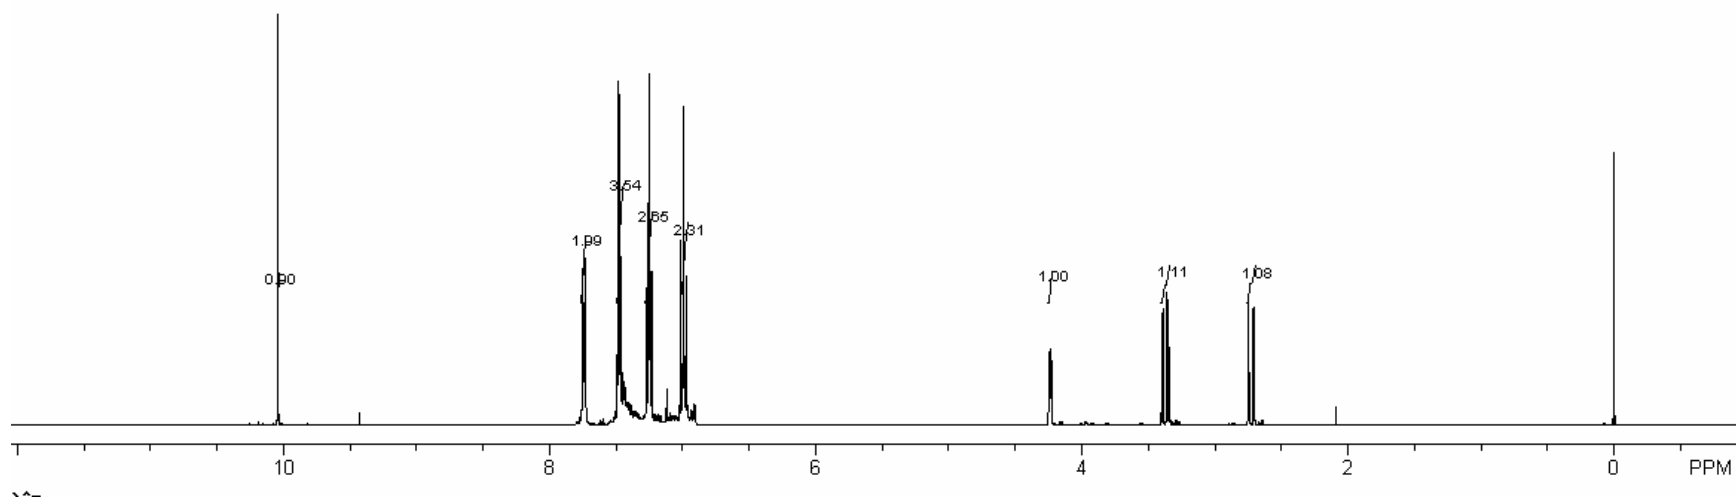

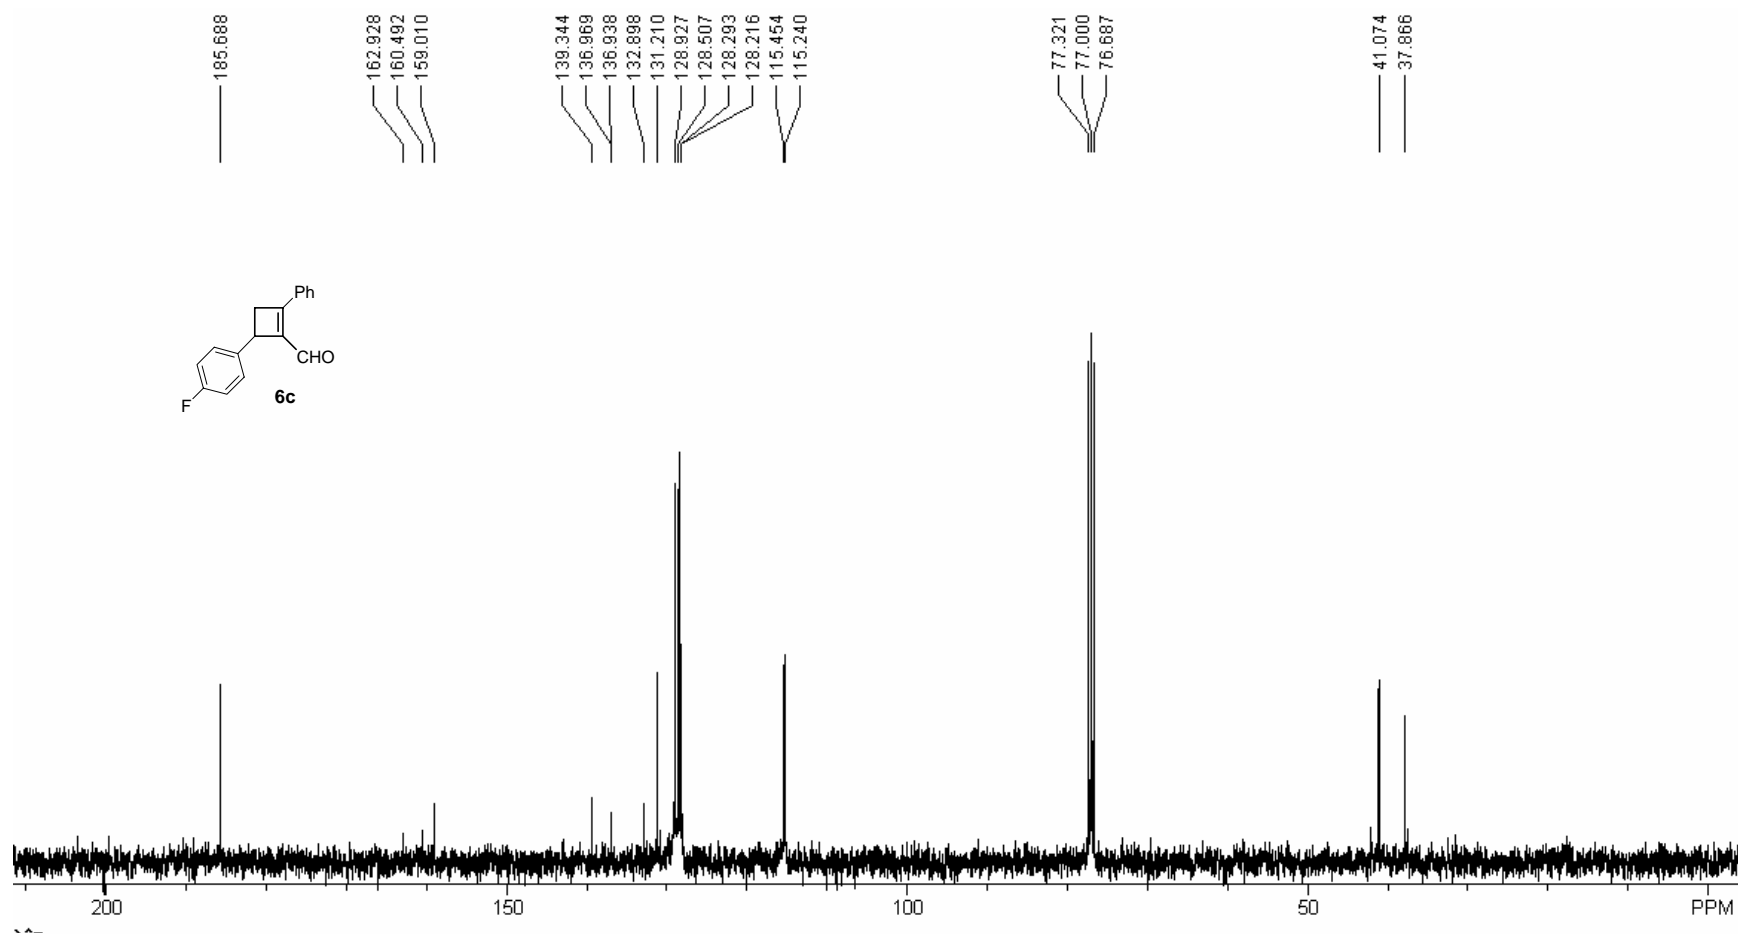

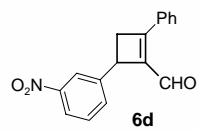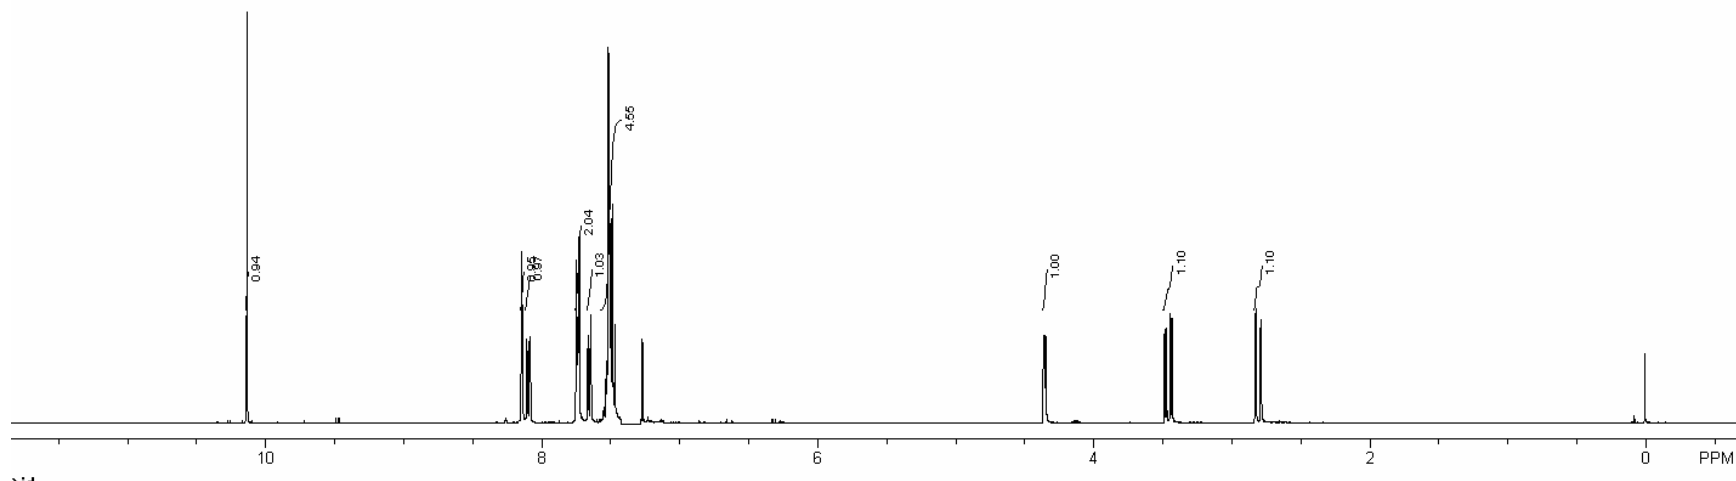



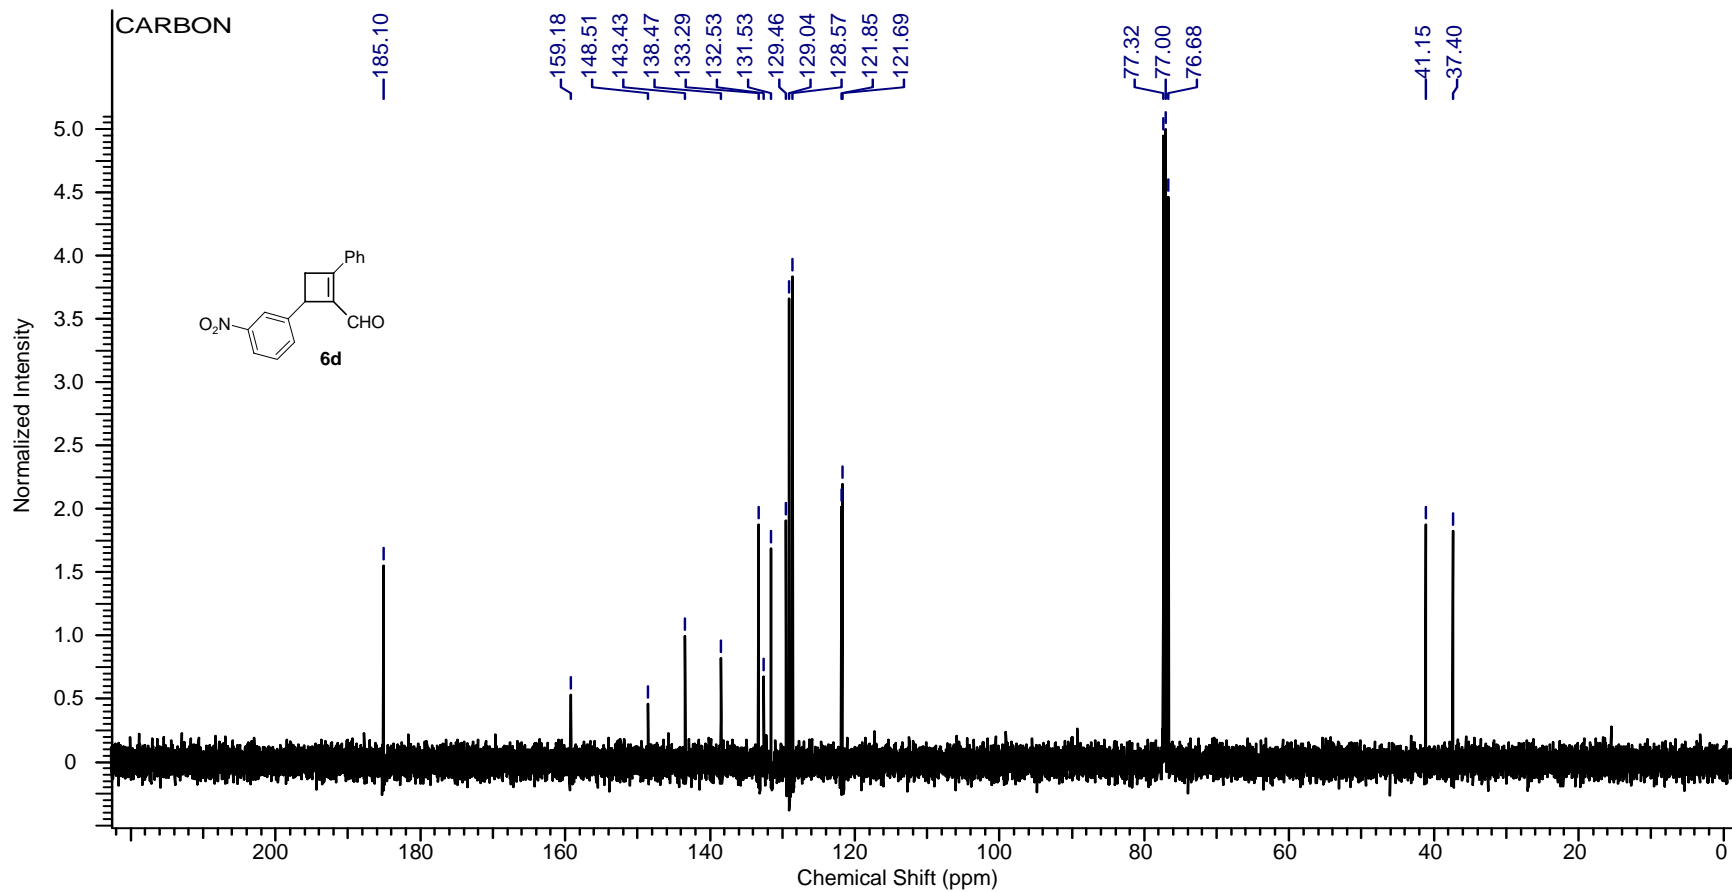

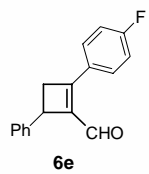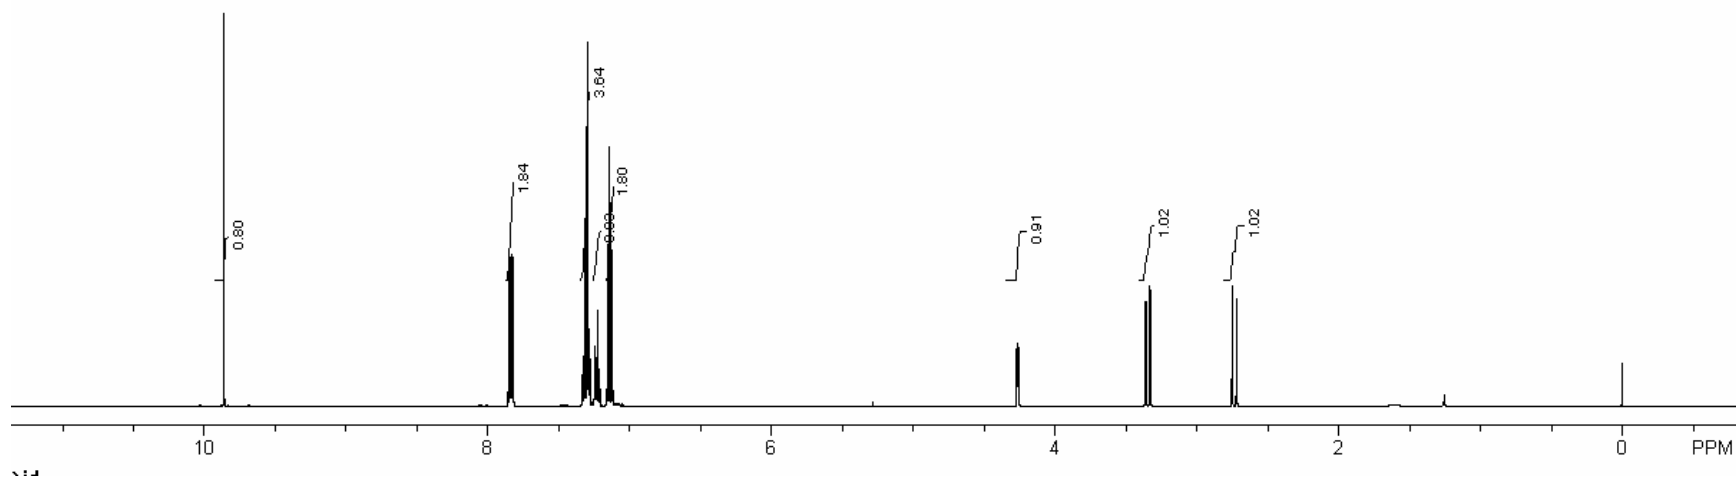

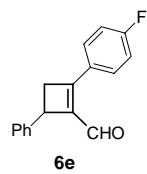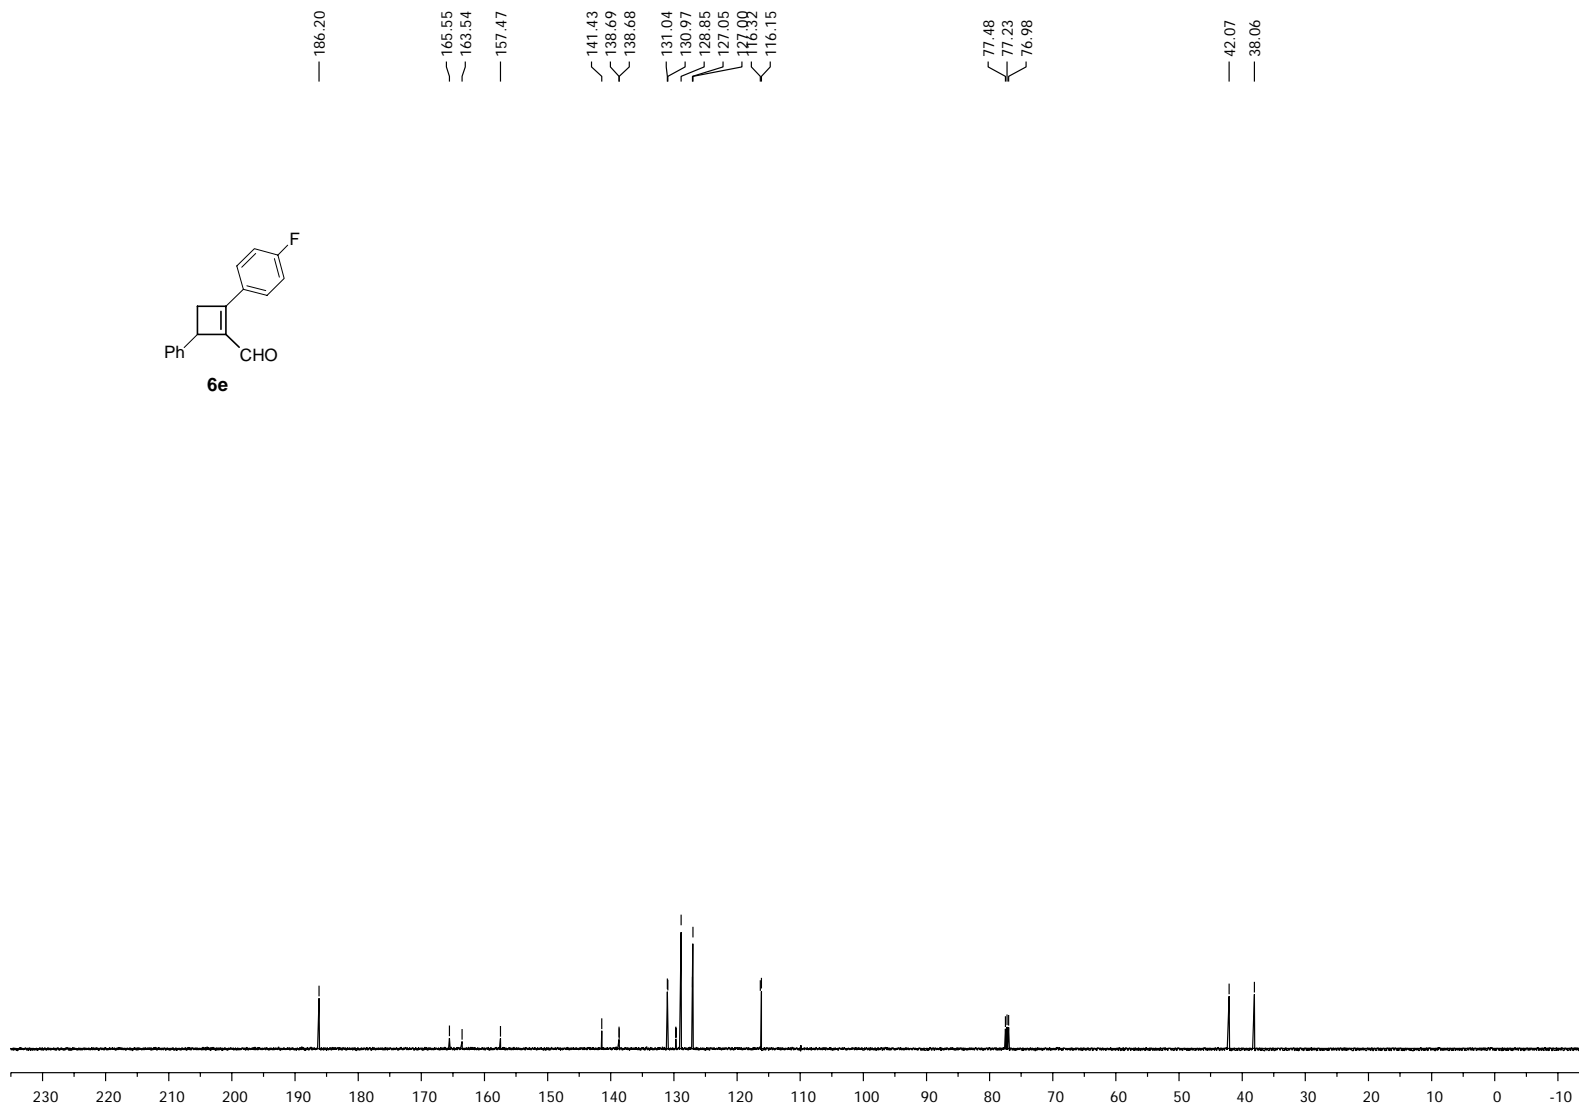

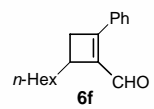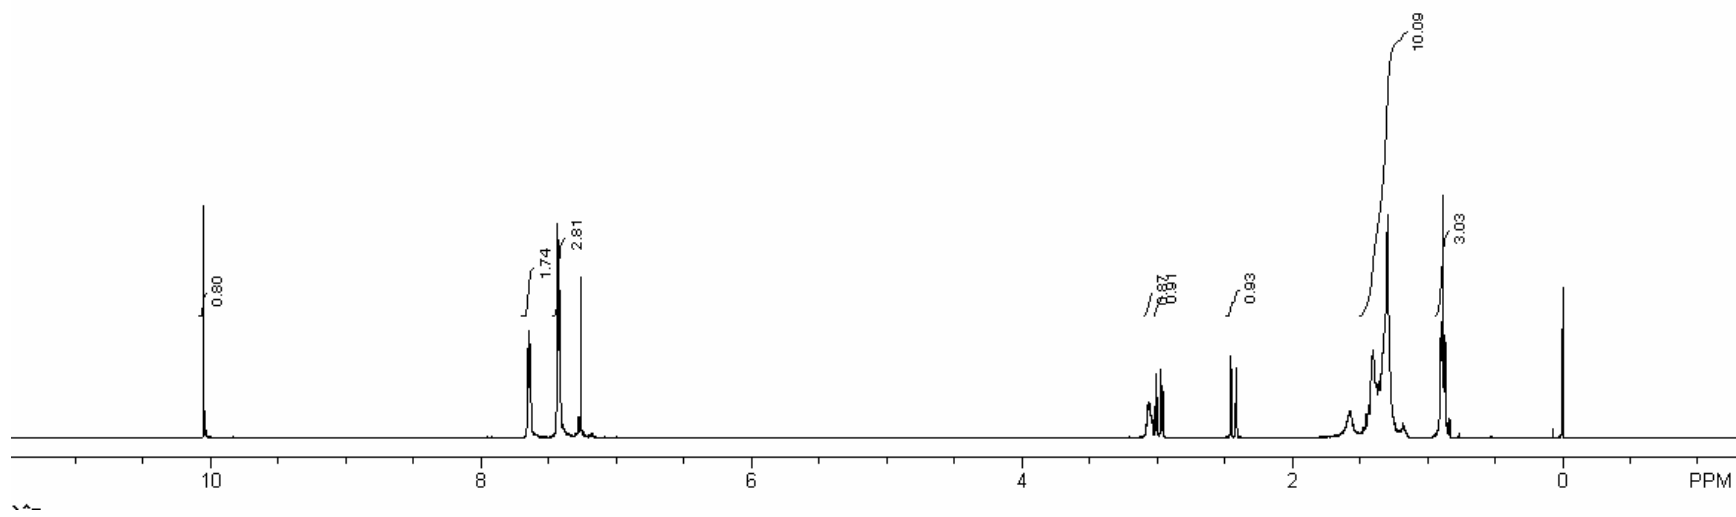

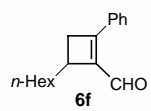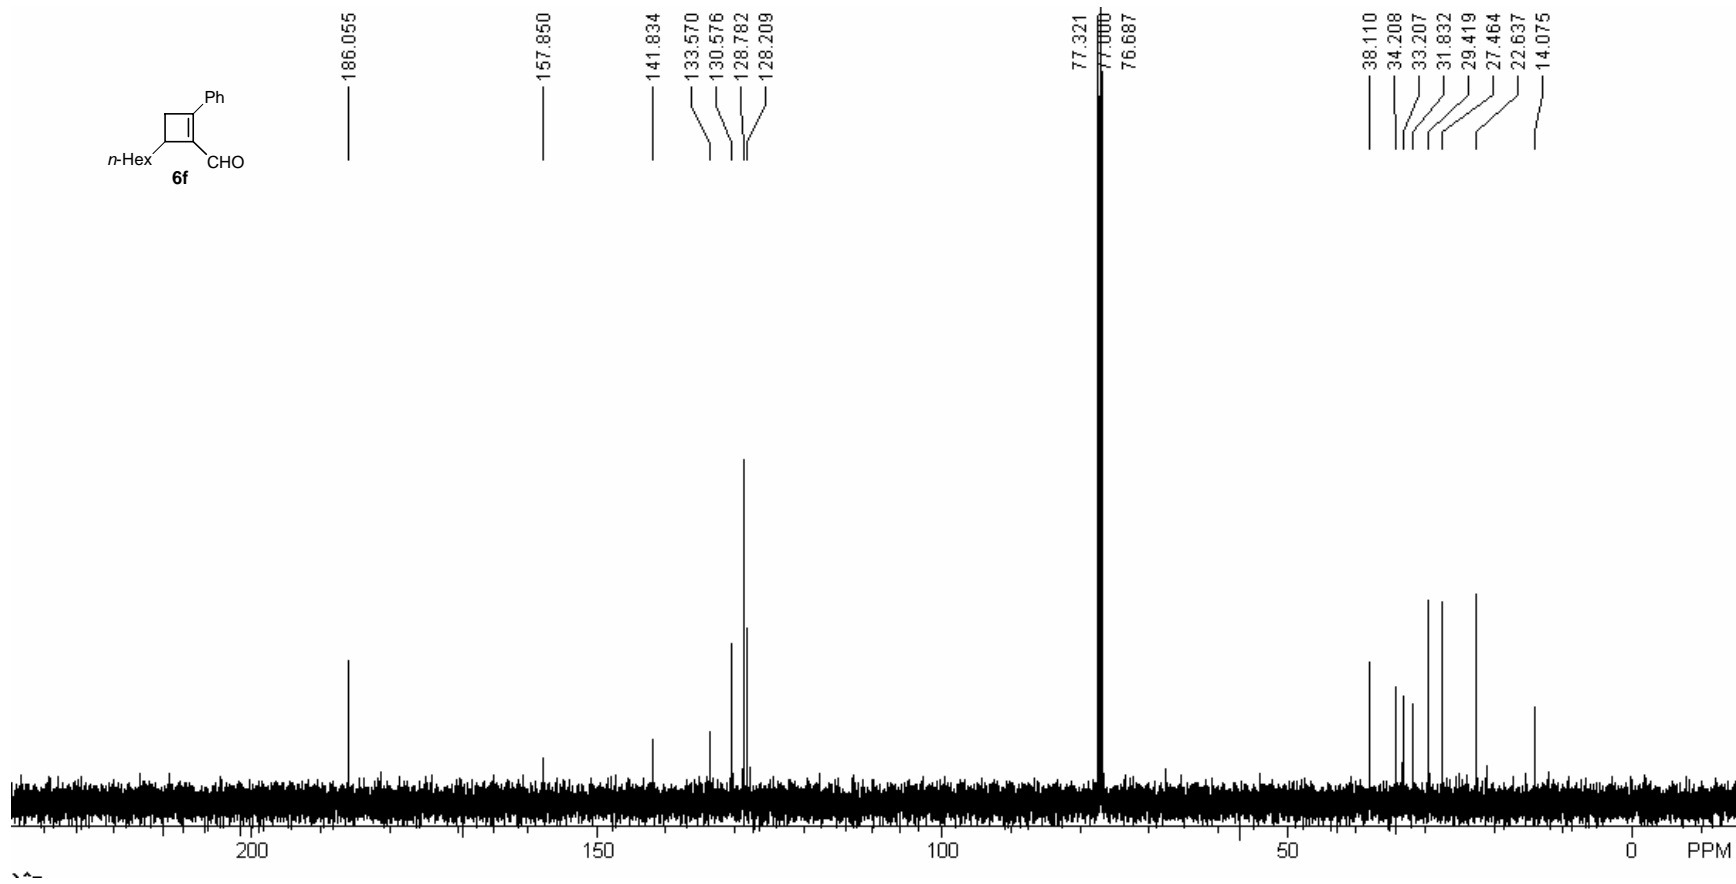

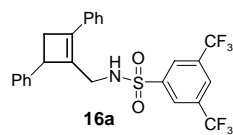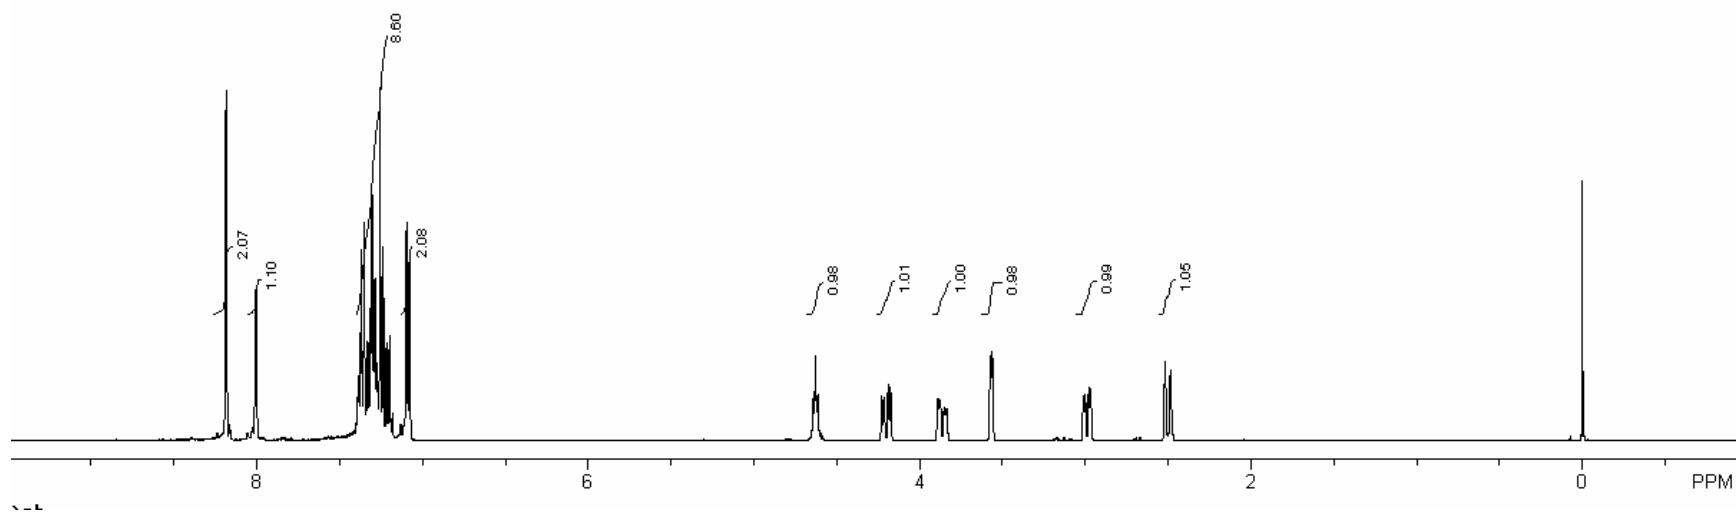

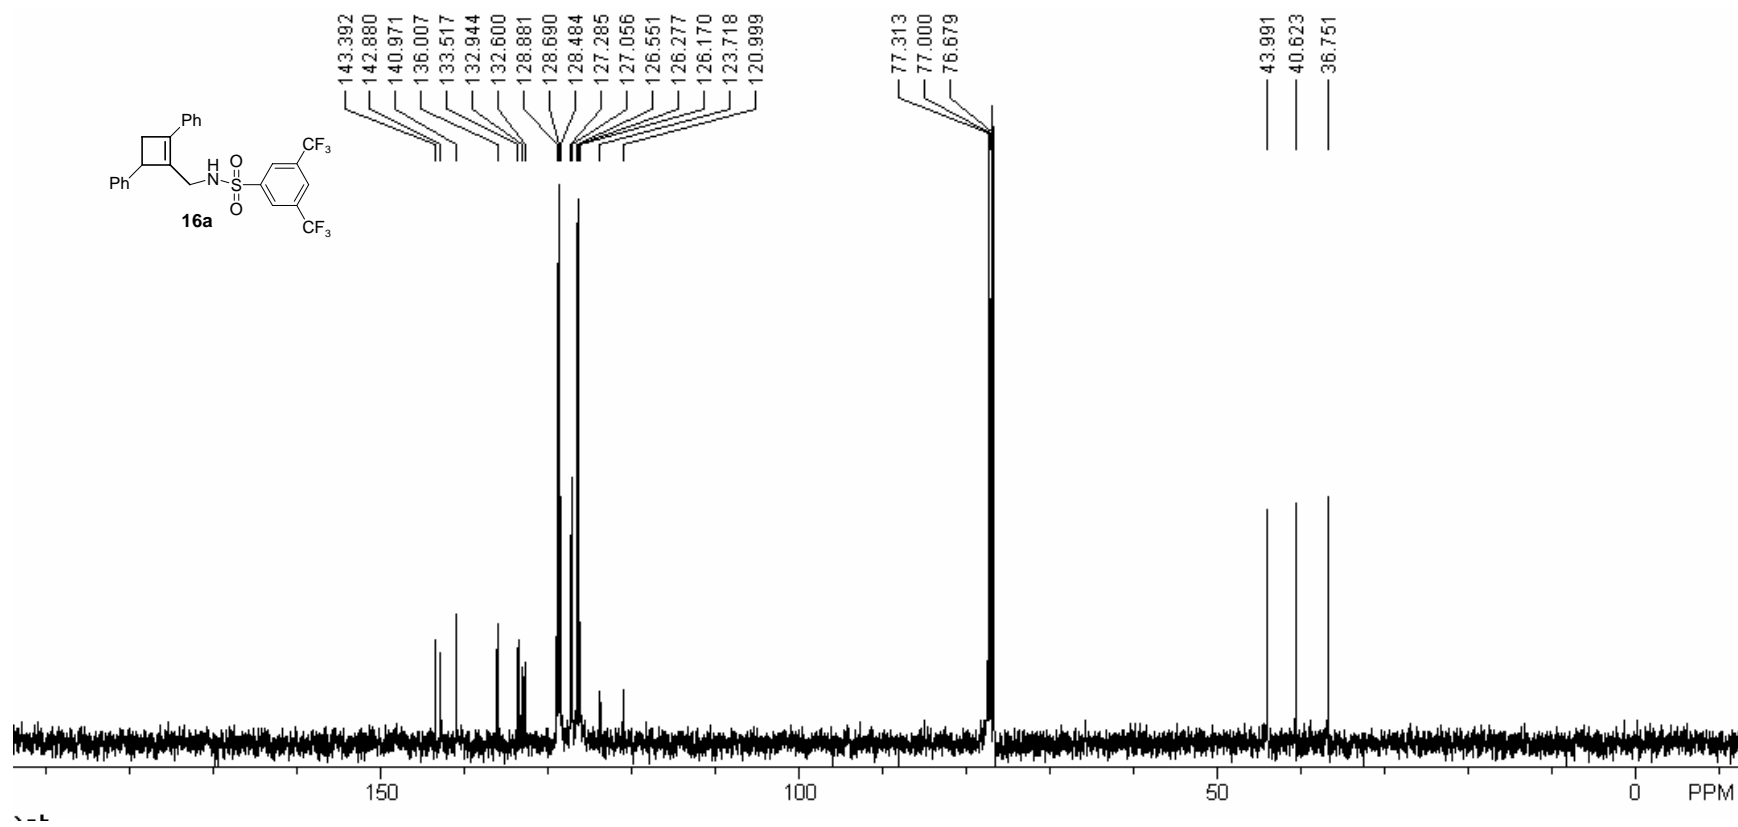

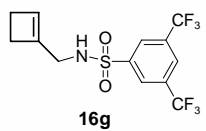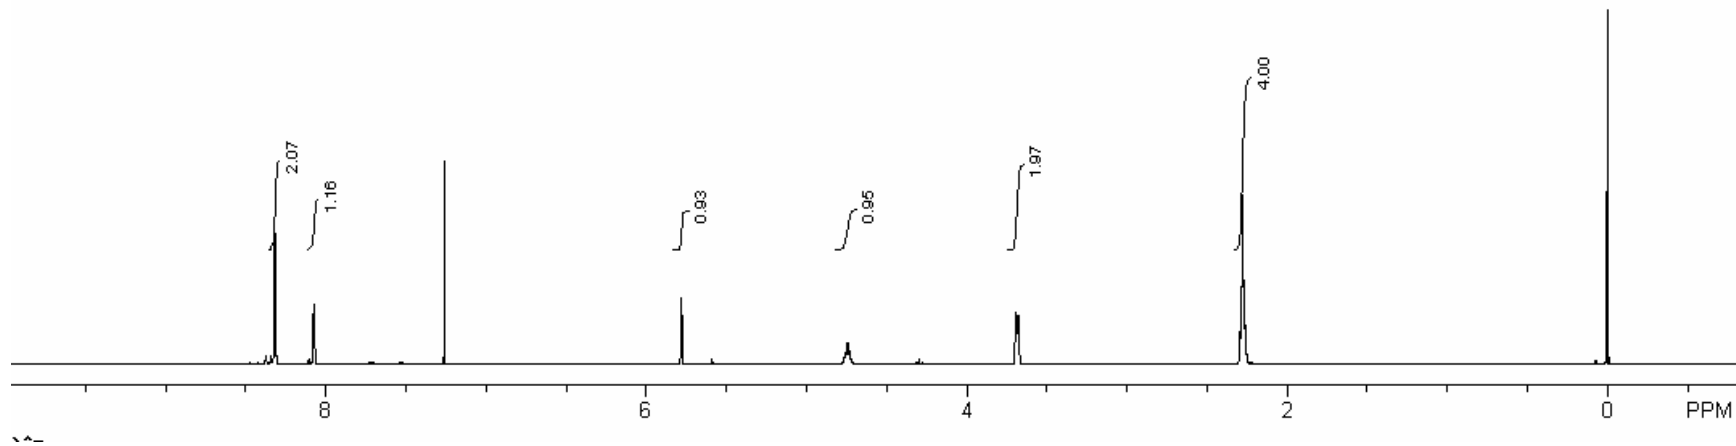



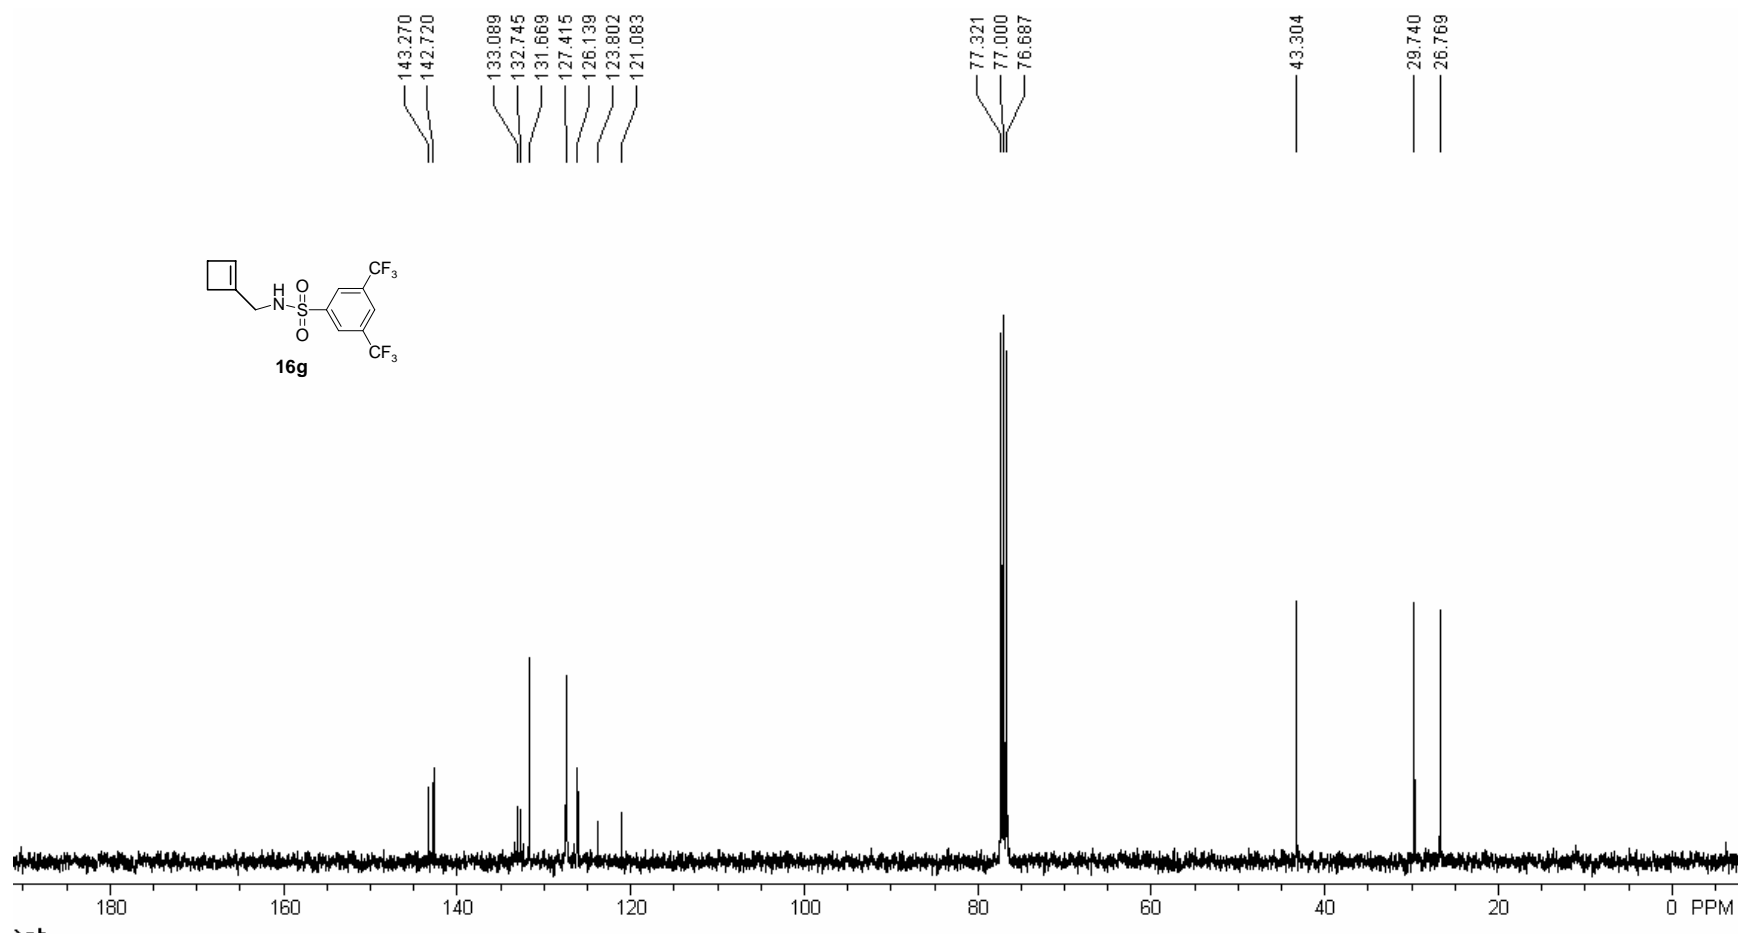

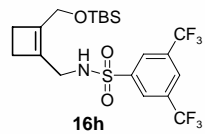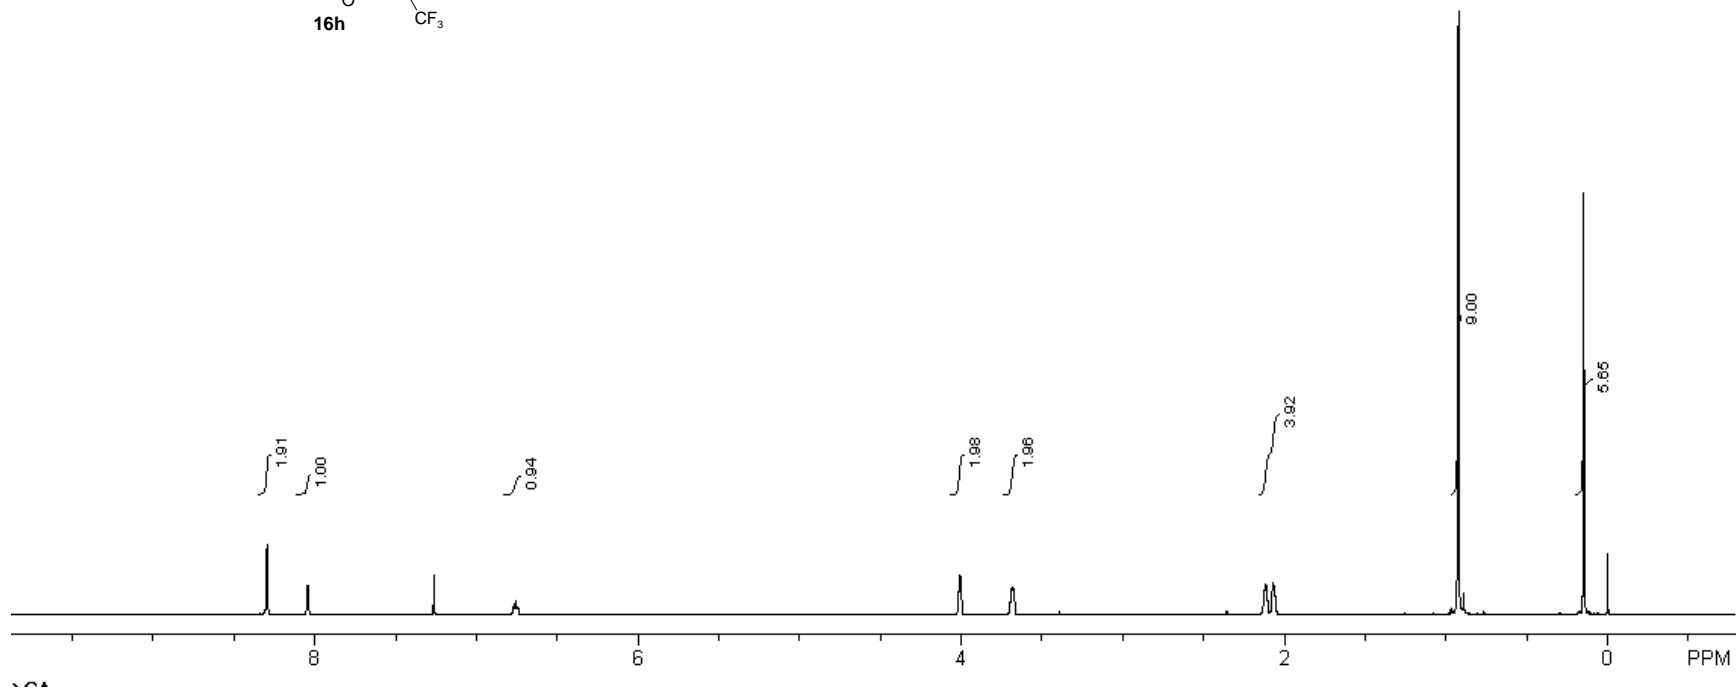

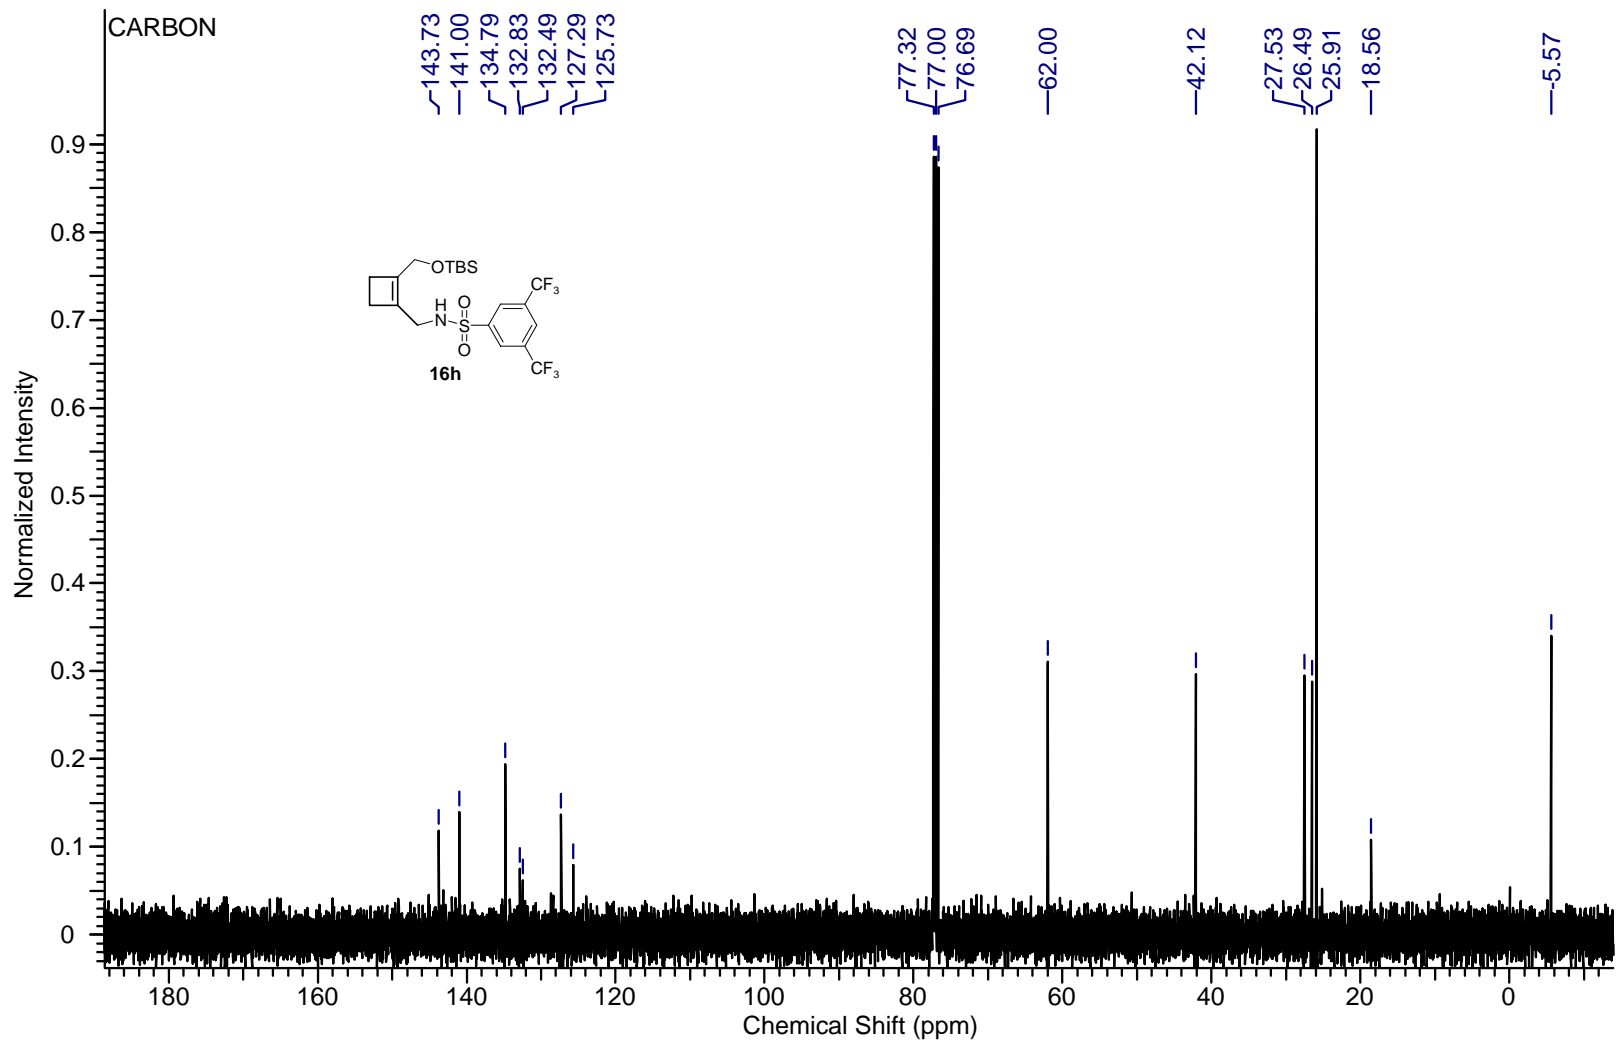

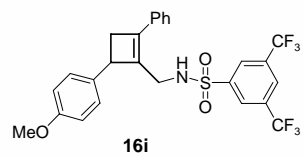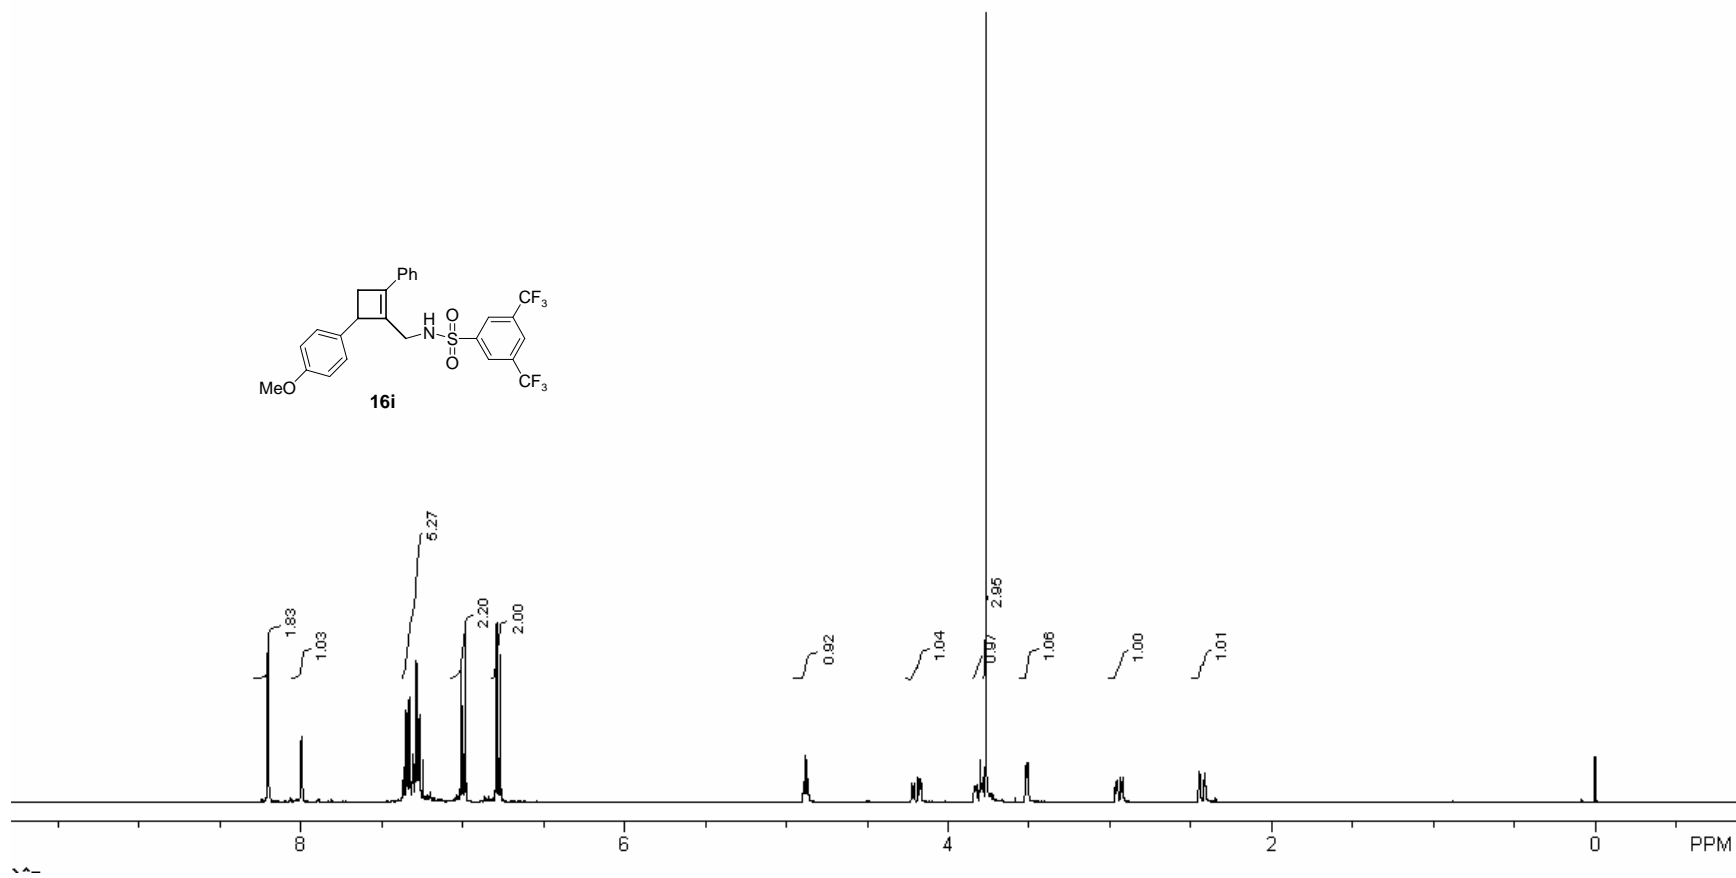

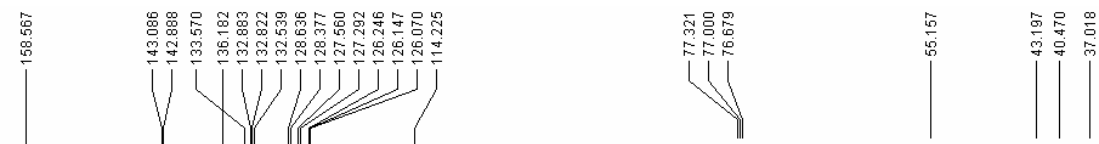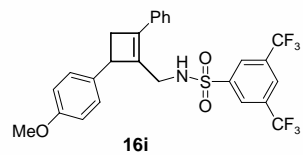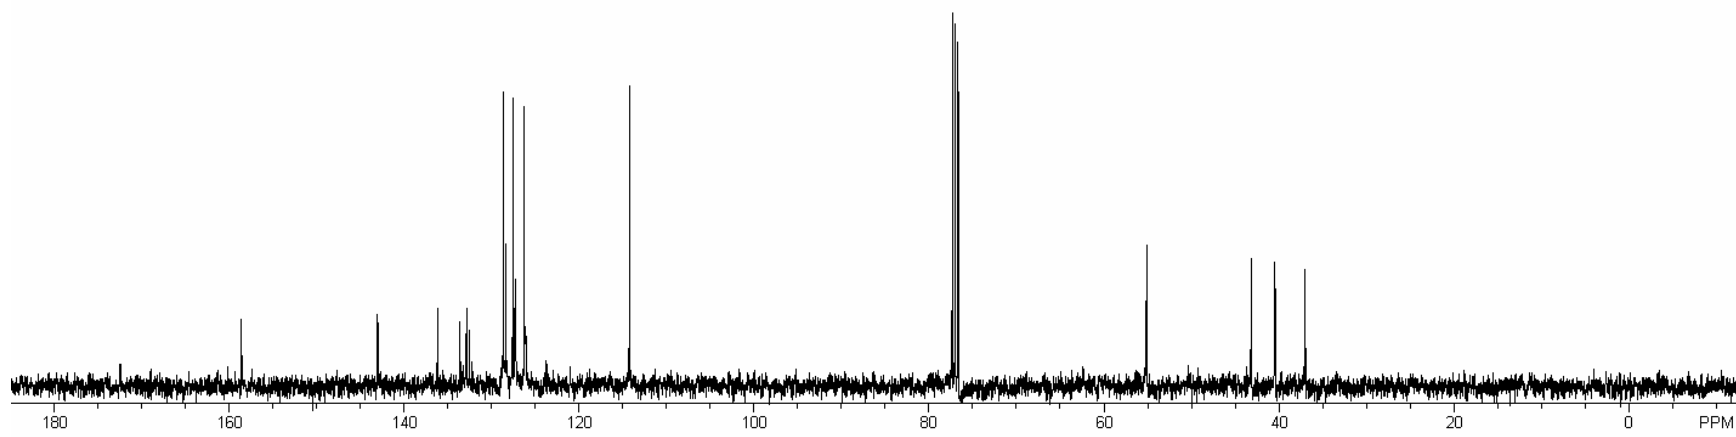

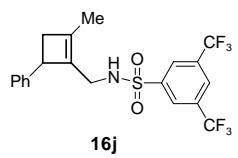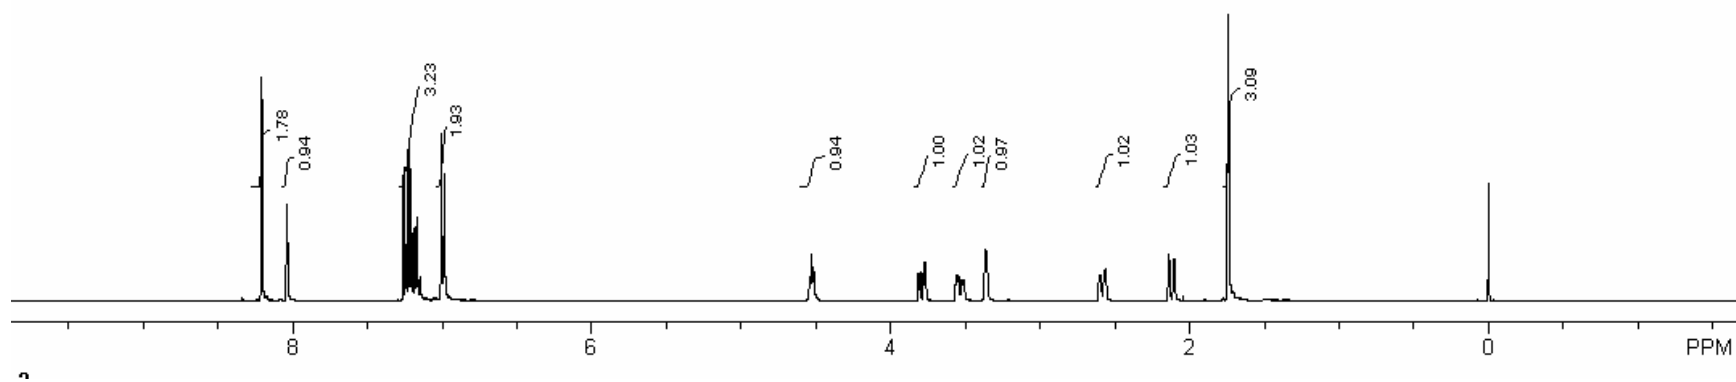

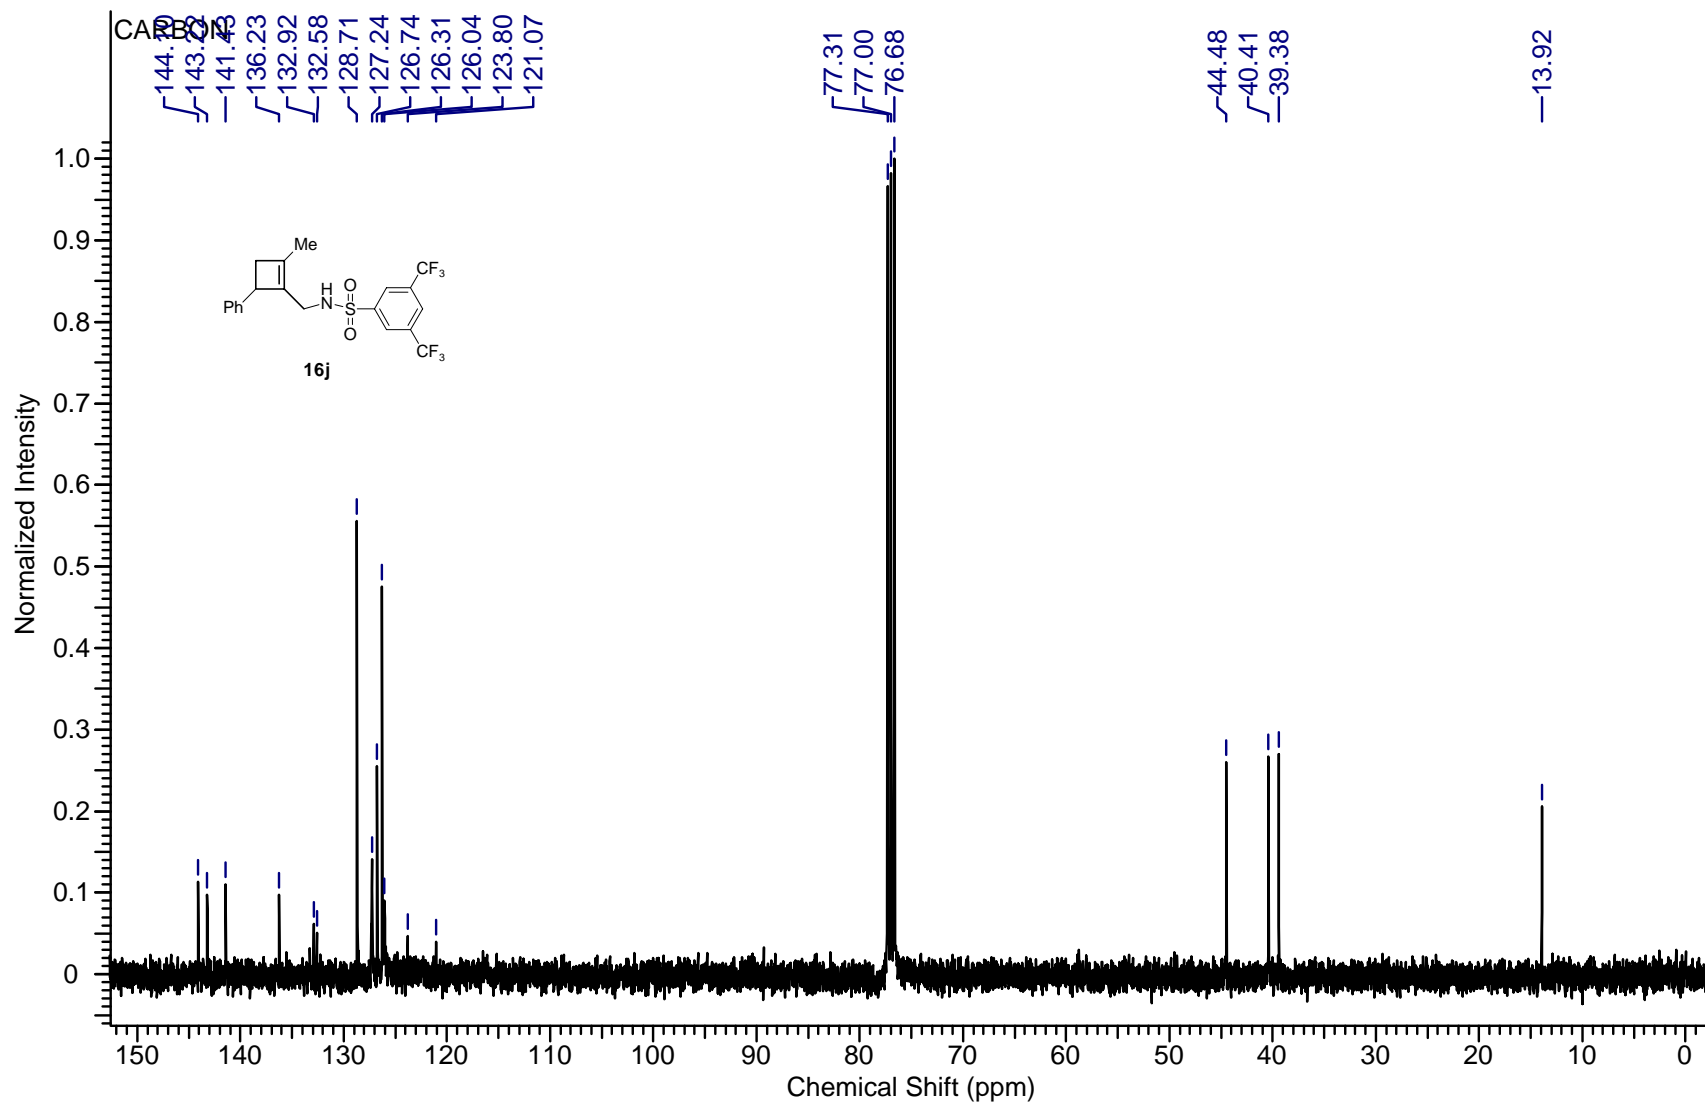

Supplement: NIHMS486840-supplement-ESI.pdf [file NIHMS486840-supplement-ESI.pdf]
